1

2

3

4 **A model of the reference frame of the ventriloquism aftereffect**

5 Peter Lokša<sup>1</sup>, Norbert Kopčo<sup>1</sup>

6 <sup>1</sup>Institute of Computer Science, Faculty of Science, P. J. Šafárik University, Jesenná 5, 04001

7 Košice, Slovakia

8 [peter.loksa@upjs.sk](mailto:peter.loksa@upjs.sk), [norbert.kopco@upjs.sk](mailto:norbert.kopco@upjs.sk),

9

10

11 Running Title: Reference frame of Ventriloquism

12

13           **ABSTRACT**

14   Background: Ventriloquism aftereffect (VAE), observed as a shift in the perceived locations  
15   of sounds after audiovisual stimulation, requires reference frame (RF) alignment since hearing  
16   and vision encode space in different RFs (head-centered, HC, vs. eye-centered, EC).  
17   Experimental studies examining the RF of VAE found inconsistent results: a mixture of HC  
18   and EC RFs was observed for VAE induced in the central region, while a predominantly HC  
19   RF was observed in the periphery. Here, a computational model examines these  
20   inconsistencies, as well as a newly observed EC adaptation induced by AV-aligned  
21   audiovisual stimuli.

22   Methods: The model has two versions, each containing two additively combined components:  
23   a saccade-related component characterizing the adaptation in auditory-saccade responses, and  
24   auditory space representation adapted by ventriloquism signals either in the HC RF (HC  
25   version) or in a combination of HC and EC RFs (HEC version).

26   Results: The HEC model performed better than the HC model in the main simulation  
27   considering all the data, while the HC model was more appropriate when only the AV-aligned  
28   adaptation data were simulated.

29   Conclusion: Visual signals in a uniform mixed HC+EC RF are likely used to calibrate the  
30   auditory spatial representation, even after the EC-referenced auditory-saccade adaptation is  
31   accounted for.

32

## 33 **1. Introduction**

34 Auditory spatial perception is highly adaptive and visual signals often guide this  
35 adaptation. In the “ventriloquism aftereffect” (VAE), the perceived location of sounds  
36 presented alone is shifted after repeated presentations of spatially mismatched visual and  
37 auditory stimuli [1-3]. Complex transformations of spatial representations in the brain are  
38 necessary for the visual calibration of auditory space to function correctly, as visual and  
39 auditory spatial representations differ in many important ways. Here, we propose a  
40 computational model and perform a behavioral data analysis to examine the visually guided  
41 adaptation of auditory spatial representation in VAE and the related transformations of the  
42 reference frames (RFs) of auditory and visual spatial encoding.

43 Several previous models were developed to describe the ventriloquism aftereffect in  
44 humans and birds. The bird models examined VAE in the barn owls [4, 5] which cannot move  
45 their eyes and therefore do not need to re-align the auditory and visual RFs. The human  
46 models mainly focused on spatial and temporal aspects of the ventriloquism aftereffect [6-8],  
47 not considering the differing RFs. There are models of the audio-visual reference frame  
48 alignment, but those only consider audio-visual integration [9] and multi-sensory integration  
49 [10] when in the auditory and stimuli are presented simultaneously, like in the ventriloquism  
50 effect, not the adaptation and transformations underlying VAE.

51 Here, we primarily examine the reference frame (RF) in which VAE occurs. While  
52 visual space is initially encoded relative to the direction of the eye gaze, the cues for auditory  
53 space are computed relative to the orientation of the head [11]. A means of aligning these RFs  
54 is necessary by the stage at which the visual signals guide auditory spatial adaptation. Our  
55 previous studies suggest that a mixture of eye-centered and head-centered RFs is associated  
56 with recalibration in the central region of the audiovisual field [12] while the head-centered

57 RF dominates for VAE locally induced in a single hemifield in the visual periphery [13].  
58 These results imply that the RF used in VAE is location dependent, possibly due to non-  
59 homogeneity in the auditory spatial representation. Specifically, recent evidence suggests that,  
60 in mammals, auditory space encoding is based on two or more spatial channels roughly  
61 aligned with the left and right hemifields of the horizontal plane [14, 15]. The current  
62 modeling explores an alternative hypothesis about the location-dependence of the RF of VAE.  
63 It assumes that the RF transformations are the same across the audio-visual field, and that the  
64 observed location-dependence is due to other adaptive processes, e.g., related to auditory  
65 saccade adaptation, as saccades were used to measure behavioral responses in the Kopco et al.  
66 [12, 13] studies. The main modeling goal is then to determine whether such a uniform,  
67 location-independent spatial adaptation is only driven by head-orientation referenced visual  
68 signals, or whether signals in eye-centered RF also contribute.

69         The second question explored here is how to separate the effect of auditory saccade  
70 adaptation from the ventriloquism-induced auditory space adaptation. Previous studies show  
71 that auditory saccades can overestimate or underestimate the actual sound locations [16] and  
72 that the amount of visually induced adaptation does not depend on whether the resulting  
73 saccades are hypometric or hypermetric [17]. Here, in the Appendix, we analyze the data from  
74 Kopco et al. [12, 13] to determine whether the ventriloquism effect and aftereffect show  
75 asymmetries depending on the resulting adaptation type (hypometric vs. hypermetric), as well  
76 as on the saccade amplitude magnitude. Based on this analysis, the current model assumes  
77 that the magnitude of the ventriloquism aftereffect is proportional to the magnitude of the  
78 ventriloquism effect, independent of whether these shifts result in hypometric or hypermetric  
79 saccades, and independent on the saccade magnitude.

80         Finally, Kopco et al. [13] observed a new adaptive phenomenon induced by aligned  
81 audiovisual stimuli presented in the periphery, exhibited as a shift in responses to sounds

82 presented alone in the central region. The shift magnitude depended on the gaze direction and,  
83 thus, was at least partly in the eye-centered RF. However, no such shift was observed when  
84 aligned audiovisual stimuli were presented in the central region [12]. The current model  
85 proposes a mechanism of a priori biases in the saccade responses, possibly due to auditory  
86 saccade adaptation, that can describe this phenomenon.

87 In the paper, we first summarize the Kopco et al. [12, 13] data modeled here, and, in  
88 the Appendix, provide a new analysis of these data to examine 1) how VAE magnitude  
89 depends on whether it results in hypometric vs. hypermetric saccades, and 2) how the VAE  
90 magnitude relates to the magnitude of the ventriloquism effect. Then, the model is introduced  
91 and two versions of it are examined in 4 simulations, each focusing on different aspects of the  
92 data and model components. The main result of the simulations is that a common location-  
93 independent mechanism can describe the data best when visual signals adapt the auditory  
94 spatial map in both head-centered and eye-centered reference frames, consistent with the idea  
95 that the reference frame of ventriloquism aftereffect is mixed.

## 96 **2. Experimental data**

97 This section summarizes the experimental methods and results from Kopco et al. [12,  
98 13]. Additionally, Appendix presents results of a new analysis of the data aimed at examining  
99 the dependence of the results on the properties of auditory saccades used by subjects for  
100 responding.

101 In the experiments, ventriloquism was induced by audio-visual training trials either in  
102 the central or peripheral subregion of the horizontal audio-visual field while the eyes fixated  
103 one location (red '+' symbol; upper and middle panels of Figure 1(A)). The aftereffect was  
104 evaluated on interleaved auditory-only probe trials using a wide range of target locations  
105 while the eyes fixated one of two locations (lower panel of Figure 1(A)). The listener's task in

106 both audio-visual and auditory-only trials was to perform a saccade to the perceived location  
107 of the auditory stimulus/component from the FP. It was expected that the AV stimuli with  
108 displaced visual component would induce a local ventriloquism aftereffect when measured  
109 with the eyes fixating the training FP (red dash-dotted lines in Figure 1(B) illustrate this  
110 prediction for the peripheral-training experiment). Confirming this expectation, the red solid  
111 and dashed lines in Figure 1(B) show that maximum ventriloquism was induced in the  
112 peripheral and central training subregion, respectively. The critical manipulation of these  
113 experiments was that a subset of probe trials was performed with eyes fixating a new, non-  
114 training fixation point (blue '+' symbol), located  $23.5^\circ$  to the left of the training fixation. As  
115 illustrated by the blue dash-dotted line in Figure 1(B), if the RF of VAE is purely head-  
116 centered, then moving the eyes to a new location is expected to have no effect, resulting in the  
117 same pattern of ventriloquism for the non-training and training FPs. On the other hand, if the  
118 RF is purely eye-centered, the observed pattern of induced shifts is expected to move with the  
119 eyes when the eyes are moved to a new location, as illustrated by the cyan dash-dotted line.  
120 The experimental data showed that, in the central experiment, moving the fixation resulted in  
121 a smaller ventriloquism aftereffect with the peak moving in the direction of eye gaze (blue  
122 dashed line), while in the peripheral experiment no effect of eye gaze position was observed  
123 (blue solid line). To better visualize these results, the lower panels of Figure 1(B) shows  
124 predictions and data expressed as difference between responses from training vs. non-training  
125 FPs from the respective upper panels. The head-centered RF always predicts that the effect  
126 would be identical for the two FPs. Thus, all head-centered predictions (brown lines) are  
127 always at zero. The yellow dash-dotted line shows a hypothetical prediction for eye-centered  
128 RF, obtained by subtracting the cyan from the red dash-dotted line. Similarly, the solid and  
129 dashed yellow lines show, respectively, for the peripheral and central data, the eye-centered  
130 RF predictions obtained by subtracting from the red lines the same red lines shifted  $23.5^\circ$  to

131 the left. Finally, the black solid and dotted lines show the actual differences between the  
132 respective red and blue data from the upper panels. For the central data, the black dashed line  
133 falls approximately in the middle between the head-centered and eye-centered predictions,  
134 showing a mixed nature of the RF of VAE induced in this region. On the other hand, the black  
135 solid line is always near zero, confirming that the RF of VAE induced in the periphery is  
136 predominantly head-centered. The current model aims to describe these differences by  
137 considering a uniform representation and adaptation process that guided by signals in both  
138 eye-centered and head-centered reference frames.

139         The results described in Figure 1(B) are based on ventriloquism aftereffect induced by  
140 visual stimuli displaced to the left or to the right of the corresponding auditory stimuli. Figure  
141 1(C) shows the baseline data obtained in runs with auditory and visual stimuli aligned. In the  
142 central-training experiment, the responses from the two FPs were similar, unbiased at the  
143 central locations and with a slight expansive bias in the periphery (both red and blue dotted  
144 lines are near zero in the center, negative in the left-hand portion and positive in the right-  
145 hand portion of the graph). On the other hand, in the peripheral-training experiment the  
146 responses in the central region differed between the two fixations, where the non-training FP  
147 responses fell well below the training-FP responses (compare the red and blue solid lines).  
148 Thus, the peripheral AV-aligned stimuli induced a fixation-dependent adaptation in the  
149 auditory-only responses in the central region. The black dashed and solid lines in Figure 1(C),  
150 showing the difference between the corresponding training and non-training FP data,  
151 highlight the FP-dependence of the peripheral experiment in contrast to the FP-independence  
152 in the central experiment. The current model assumes that these adaptive effects can be  
153 explained by a combination of biases in visual saccades to auditory stimuli and a visually  
154 guided adaptation in the spatial auditory representation.

155         ----- Insert Figure 1 around here -----

### 156 **3. Model Description**

#### 157 *3.1 Overview*

158 Figure 2A shows the outline of the model. The model predicts the azimuthal bias in  
159 the saccade response to an auditory-only probe (the “Response” block in panel A) as a  
160 function of the probe azimuth, with additional parameters of the fixation location on a given  
161 trial (“Probe stimulus and fixation” block) and the audio-visual training locations and the  
162 measured audio-visual response biases in a given experimental training session  
163 (“Ventriloquism” block). Thus, the model does not require information about the direction of  
164 audio-visual stimulus displacement during training (whether the visual stimuli were shifted to  
165 the left, right, or aligned with the auditory stimuli). Instead, it only uses the information about  
166 where the training occurred and what the resulting ventriloquism effect was. Here, the model  
167 assumes that there is a direct relation between the observed ventriloquism effect and  
168 aftereffect, as shown in the Appendix. The ventriloquism aftereffect prediction is then  
169 modeled as an additive combination of two components, a saccade-related bias in eye-  
170 centered reference frame and a saccade-independent visually guided adaptation of auditory  
171 space representation (square blocks in panel A). The saccade-related bias is present *a priori*  
172 and it is not directly adapted by ventriloquism, while the auditory spatial representation is  
173 locally adapted by the ventriloquism signals in different reference frames and its size also  
174 depends on the saccade-related bias.

175 Two versions of the model are evaluated, differing only by the assumed form of  
176 adaptation of the auditory space representation. First, in the HC model, the visual signals  
177 adapt the auditory spatial representation exclusively in the head-centered reference frame (the  
178 “HC” arrow in panel A), so the signals are assumed to be transformed to HC before inducing  
179 adaptation. In the HEC model, the visual signals adapt the auditory spatial representation in



180 both head-centered and eye-centered RFs (“HC” and “EC” arrows) such that the relative  
181 contribution of the HC and EC RFs can be arbitrary. I.e., the HEC model reduces to the HC  
182 model if the weight of the EC path is set to zero, or it can produce predictions using only EC  
183 RF if the HC weight is set to zero.

184 In summary, both models assume that the spatial representations and adaptations are  
185 uniform, predicting the same results independent of whether the training occurs in the center  
186 or in the periphery. The main difference between the two models is that the HC model  
187 assumes that the auditory space adaptation occurs purely in head-center coordinates, while it  
188 is the gaze-direction-referenced properties of the auditory saccades that cause any eye-  
189 centered effects observed in the data. On the other hand, the HEC model assumes that, even  
190 after accounting for the saccade-related effects, the auditory spatial representation receives the  
191 adaptive visual signals in both reference frames, causing adaptation that always depends on  
192 the position of the stimuli relative to the eye gaze direction. Importantly, the model assumes  
193 that if the ventriloquism aftereffect is not induced and measured by auditory saccades, as used  
194 in the Kopco et al. [12, 13]. studies, the saccade-related bias would not affect the  
195 performance.

### 196 *3.2 Detailed Specification*

197 The following model specification applies to the more general HEC model version,  
198 with the differences applying to the HC model described as needed. Panels B-D of Figure 2  
199 provide visualizations of the behavior of different parts of the model.

200 Equation 1 describes the predicted bias in responses  $\hat{r}$  to a given auditory stimulus  
201 location  $s$  as a weighted sum of a saccade-related bias  $r_E$  and a ventriloquism-related  
202 adaptation in auditory spatial representation  $r_V$

$$203 \quad \hat{r}(s) = r_E(s) + w \cdot r_V(s), \quad (1)$$

204 where  $w \in [0, \infty]$  is a free parameter specifying the relative weight of the  
205 ventriloquism adaptation. In addition to the stimulus location  $s$ , the prediction (illustrated in  
206 Fig. 3D) also depends on the fixation point on a given trial  $f$ , on the training region specified  
207 by the training AV stimulus locations  $s_{AV}$ , and on the observed biases in AV stimulus  
208 responses at these locations  $r_{AV}$  (all variables in the units of degrees).

209 The saccade-related bias at a specific location  $x$  for eyes fixating the location  $f$  is  
210 modeled as a sigmoidal function

$$211 \quad r_E(x) = \frac{2 \cdot h}{1 + e^{-k(x+cf)}} - 1, \quad (2)$$

212 where  $h, k$ , and  $c$  are free parameters characterizing the sigmoid. The saccade-related  
213 bias (Figure 2B) is broad and referenced to the FP (i.e., it uses EC RF), exhibiting a  
214 combination of underestimations and overestimations commonly observed in studies of  
215 auditory saccades [9, 16, 18]. However, the specific shape of the functions used here was  
216 chosen to best fit the peripheral and central no-shift data shown in Fig. 1C. Specifically, the  
217 predictions roughly follow the values observed at each location in Fig. 1C when no  
218 audiovisual training is used at a given location (the central-experiment data for the right-most  
219 location triplet, the peripheral-experiment data for the central triplet, and data from both  
220 experiment for the left-most triplet). Thus, it is assumed that this saccade-related bias is  
221 present *a priori*, independent of the induced ventriloquism. Also, it is assumed that the bias  
222 only depends on the probe location re. FP location, which, for the current data means that the  
223 bias graphs for training and non-training FPs are symmetrical about the origin with respect to  
224 each other (blue and red lines in Fig. 2B).

225 The ventriloquism-driven auditory space adaptation causes bias defined at location  $x$ ,  
226 for eyes fixating the location  $f$ , and for ventriloquism induced at training locations  $s_{AV}$  and  
227 resulting in AV response biases  $r_{AV}$ , as a weighted sum:

228 
$$r_V(x) = \sum_{i=1}^N w_{v,i}(x) \cdot [r_{AV,i} - r_E(s_{AV,i})], \quad (3)$$

229 where  $N$  is the number of training locations ( $N = 3$  for the current study),  $i$  is an index  
230 through these locations,  $s_{AV,i}$  is the  $i$ -th training location azimuth, and  $r_{AV,i}$  is the AV response  
231 bias observed at the  $i$ -th training location. The differences  $r_{AV,i} - r_E(s_{AV,i})$  represent the  
232 disparity between the AV response biases (green diamonds in Figure 2B) and the saccade-  
233 related bias (red/blue lines in Figure 2B) at the training locations. The disparities are shown in  
234 Figure 2C by the red and blue full diamonds.  $w_{v,i}(x)$  is the strength with which the disparity  
235 at the  $i$ -th training location adapts the spatial representation at the location  $x$ . In the HEC  
236 model, this value is a weighted sum of the adaptation strengths in head-centered and eye-  
237 centered reference frames, defined as:

238 
$$w_{v,i}(x) = (1 - w_E) \cdot w_{vH,i}(x) + w_E \cdot w_{vE,i}(x), \quad (4)$$

239 where  $w_E \in (0, 1)$  is a parameter determining the relative weight of the EC reference  
240 frame vs. the HC RF (in the HC model,  $w_E = 0$ ). Finally,  $w_{vH,i}$  and  $w_{vE,i}$  use normalized  
241 Gaussian functions centered at training locations as a measure of influence of the  $i$ -th training  
242 location on the target location  $x$ , in the two reference frames:

243 
$$w_{vH,i}(x) = G(x, s_{AV,i}, \sigma_H), \quad (5)$$

244 
$$w_{vE,i}(x) = G(x, s_{AV,i} + f - 11.25^\circ, \sigma_E), \quad (6)$$

245 
$$G(x, \mu, \sigma) = \frac{\mathcal{N}(x, \mu, \sigma)}{\sum_{i=1}^N \mathcal{N}(7.5 \cdot (i-2), 0, \sigma)}, \quad (7)$$

246 In Eqs. 5 and 6, the parameters  $\sigma_H$  and  $\sigma_E$  represent the width of the influence of the  
247 ventriloquism shift at individual training locations, separately for the two reference frames.  
248  $w_{vH,i}$  (Eq. 5) is always centered on the  $i$ -th training location in the HC RF, whereas  $w_{vE,i}$  (Eq.  
249 6) is centered on the  $i$ -th training location in the EC RF (for the training FP, the two RFs are  
250 aligned). Finally, the Gaussian functions are normalized (Eq. 7) such that the maximum  $w_{vH,i}$

251 or  $w_{vE,i}$  after summing across the three training locations is 1 (the normalization locations  
252  $7.5 \cdot (i - 2)$  are specific for the current training and they need to be modified for other data  
253 with different training locations).

254 Figure 2C shows the operation of the ventriloquism adaptation. As mentioned above,  
255 the red and blue filled diamonds are the disparities at the individual training locations driving  
256 the adaptation in HC RF. The blue open diamonds are identical to the blue filled diamonds  
257 except that they are shifted to the left by the difference between the two FPs to illustrate how  
258 the eye gaze shift affects where the adaptation is expected to occur in the EC RF. The red and  
259 blue lines are then the resulting biases  $r_V$  for the two fixation locations, each corresponding to  
260 the sum of Gaussians centered at different training locations in the two RFs (and with widths  
261 defined by the  $\sigma$ 's). Parameter  $w_E$  determines the relative weights of the peaks in the blue line  
262 corresponding to the open diamonds vs. those corresponding to the filled diamonds. In  
263 summary, the blue and red lines show how visually guided adaptation is local and RF-  
264 dependent, decreasing with distance from location at which AV stimuli were present in HC  
265 and EC RFs. It also shows that since adaptation causes shifts from the saccade-bias response  
266 locations towards AV response locations, if AV responses fall on saccade bias locations, no  
267 visually guided adaptation is predicted to occur.

268 Finally, Figure 2D shows that the model prediction is a sum of the saccade bias (from  
269 Figure 2B) and ventriloquism bias (Figure 2C) weighted by the parameter  $w$  (note that no  
270 scaling parameter is needed for the saccade bias as parameter  $h$  already can make this bias  
271 arbitrarily large).

272 ----- Insert Figure 2 around here -----

273 **4. Methods**

274 *4.1 Stimuli*

275 The data from studies of Kopco et al. [12, 13], simulated here, induced ventriloquism  
276 by presenting training stimuli with visual component either shifted to the left, to the right, or  
277 aligned with the auditory component, while the eyes fixated one location (Fig. 1A; upper and  
278 middle panels). The aftereffect was always measured by presenting auditory-only stimuli  
279 while eyes fixated one of the two FPs (Figure 1A; lower panel). Thus, nominally, there were 6  
280 conditions (3 shift directions by 2 training regions), corresponding to AV locations and  
281 responses shown by triplets of open symbols in Figure A1A. For these conditions, predictions  
282 could be compared to data for 9 locations at 2 FPs. However, the main experimental results  
283 simulated here were observed when differences between FPs were considered on aftereffect  
284 magnitude data, obtained by subtracting positive-shift data from negative-shift data and  
285 halving the result (Figure 1B; lower right panel; note that the latter difference is equivalent to  
286 averaging the magnitudes of “positive shift – no shift” and “negative shift – no shift”). These  
287 “double differential” (“positive – negative” difference of “training FP – non-training FP”  
288 difference) data were the most stable as they eliminated a lot of between-subject variability  
289 related to individual biases in responses (as will be illustrated later). Therefore, to focus the  
290 model on these important differences, the data were also transformed into the difference  
291 representation in two steps.

292 First, the data for the two training FPs were orthogonally transformed such that instead  
293 of using training and non-training FP, a sum and a difference across the two FPs was used.  
294 I.e., instead of having for each condition 18 data points corresponding to 9 locations at 2 FPs,  
295 we used 18 data points consisting of 9 locations summed across the two FPs and 9 locations  
296 for difference across the 2 FPs.

297           Second, the positive-shift and negative-shift condition data were transformed in a  
298 similar way, such that instead of positive and negative shift we used the aftereffect magnitude  
299 (i.e., a halved difference between the two shifts) and average across the two shifts. The no-  
300 shift data were left unmodified.

301           The complete data set therefore consisted of 108 data points [9 (locations) x 2  
302 (transformed FPs) x 3 (transformed shifts) x 2 (training regions)]. Across-subject mean and  
303 standard deviation data were used in the simulations.

#### 304 *4.2 Simulations*

305           Four simulations were performed in this study, each assessing both the HC and HEC  
306 models on a different subset of the Kopco et al. [12, 13] data. The first two simulations, No-  
307 Shift and All Data simulations, tested two main hypotheses about the current data and  
308 reference frame. Two supplementary simulations, Central Data and Peripheral Data  
309 simulations, were performed confirm that the model behavior matches the conclusions of the  
310 Kopco et al. [12, 13] studies when considered separately.

311           **No Shift simulation** assessed the models on the AV-aligned baseline no-shift data  
312 from both experiments (Figure 1C), examining the interaction between the saccade-related  
313 bias and visual signals when no ventriloquism is induced.

314           **All Data simulation** is the main simulation of this study. In this simulation the models  
315 were fitted on the complete dataset from both experiments (Figure 1B and C) to examine  
316 whether a uniform representation of the reference frame of ventriloquism aftereffect is mixed  
317 or purely head-centered.

318           **Central Data simulation** fitted only the central-training data from the positive-shift  
319 and negative-shift conditions (dashed lines in Figure 1B) while predictions were generated for

320 all the data. The main goal was to examine the reference frame in which the ventriloquism  
321 aftereffect is induced in the central region.

322 **Peripheral Data simulation** fitted only the peripheral-training data from the positive-  
323 shift and negative-shift conditions (solid lines in Figure 1B) while predictions were generated  
324 for all the data. The main goal was to examine the reference frame in which the ventriloquism  
325 aftereffect is induced in the audiovisual periphery.

#### 326 *4.3 Model Fitting and Evaluation*

327 Each simulation was performed by fitting the two models to the corresponding subset  
328 of the transformed data using a two-step procedure. First, a systematic search through the  
329 parameter space was performed, using all combinations of 10 values for each parameter, listed  
330 in Table 1 (HEC model used all 7 parameters, while HC model only used 5 of them). The  
331 limits of the range were chosen by piloting to cover the expected range of behaviors of the  
332 model. Note that quadratic spacing was chosen for parameters  $k$  and  $c$  as the behavior of the  
333 sigmoidal function varies non-uniformly with the parameter values ( $k$  was sampled more  
334 densely at the lower end of the range,  $c$  at the higher end). Then we selected the best 100  
335 parameter combinations in terms of weighted MSE, in which each data point was weighted by  
336 the inverse of the across-subject standard deviation in that data point. These parameter  
337 combinations were then used as starting positions for non-linear iterative least-squares fitting  
338 procedure (Matlab function `lsqnonlin`) which, again, minimized the weighted MSE. The  
339 parameter values obtained by the best of these fits were chosen as the optimal values.

340 ----- Insert Table 1 around here -----

341

342 To compare the models' performance while accounting for the number of parameters  
343 used by each model, we computed the Akaike information criterion AICc [19, 20] for each  
344 optimal fit, defined as:

$$345 \quad \text{AICc} = -2\log(L) + 2K + 2K \frac{K+1}{n-K-1}, \quad (8)$$

$$346 \quad \log(L) = -\frac{n}{2} \left( \log(2\pi) + \log \frac{\text{SSE}(X)}{n} + 1 \right) \quad (9)$$

347 where  $n$  is the number of experimental data points,  $K$  is the number of fitted  
348 parameters, and  $\text{SSE}(X)$  is the sum of squares of errors across the data points (i.e., differences  
349 between predictions and across-subject mean data  $x_i$ ) weighted for each data point by the  
350 inverse of its across-subject standard deviation  $\frac{1}{SD(x_j)}$ . In general, the model with the lower  
351 AICc is considered to be a better fit for the data. Then, to determine whether the data provide  
352 substantial support for one model over the other one, we computed  $\Delta\text{AIC}$  as the difference in  
353 AICc values of the model with the higher AICc vs. the one with the lower AICc. And, we use  
354 the following rule to determine whether the model with the lower AICc is substantially better  
355 than the other model [19]: "Models having  $\Delta\text{AIC} \leq 2$  have substantial support (evidence),  
356 those in which  $4 \leq \Delta\text{AIC} \leq 7$  have considerably less support, and models having  $\Delta\text{AIC} > 10$   
357 have essentially no support.". Thus, only if  $\Delta\text{AIC}$  is substantially larger than 2, the result is  
358 interpreted as evidence in favor of the model with lower AICc.

### 359 **5. Simulation Hypotheses and Results**

360 The results of the 4 simulations performed in this study are summarized in Table 2,  
361 which shows for each simulation and model the fitted model parameter values and the  
362 model's performance measured using the AICc criterium.

363 ----- Insert Table 2 around here -----



364 *5.1 No-shift simulation*

365 This simulation focused on the AV aligned data, examining the hypothesis that *the*  
366 *saccade-related bias combined with auditory space adaptation in HC RF causes the training-*  
367 *region-dependent differences in the AV-aligned baseline data* (Figure 1C). I.e., it was  
368 predicted that EC visual signals adapting the auditory space representation do not need to be  
369 considered to explain the different adaptation effects observed in central vs. peripheral AV-  
370 aligned training. This hypothesis would be confirmed if the two models, HC and HEC,  
371 captured the behavioral data equally well.

372 Figure 3 presents the results of the simulation of the AV-aligned baseline no-shift  
373 condition from both experiments. Panel A shows the biases of the two model components  
374 (rows) for each of the two models (colors) with the fitted parameters as listed in Table 2,  
375 separately for the two fixation points (columns). The same fitted model parameters apply to  
376 both the central and peripheral training experiments. For the saccade-related bias (upper row)  
377 that means that the plotted graphs apply to both data equally. However, for the auditory space  
378 adaptation component (lower row), the plotted graphs apply to central training, since they  
379 show the effect of training at the 3 central locations ( $-7.5^\circ$ ,  $0^\circ$ ,  $+7.5^\circ$ ). The graphs need to be  
380 shifted to the right by  $22.5^\circ$  to see their effect for peripheral training data.

381 Panel B shows the data (circles with error bars corresponding to the standard error of  
382 the mean) and predictions of the two models (lines), separately for the two training points  
383 (upper and middle rows), as well as for the difference between the FPs (lower row). The  
384 columns represent the two training regions. Each prediction in the upper and middle rows is,  
385 roughly, a weighted sum of the corresponding components from panel A, while the  
386 predictions in the lower row of panel B show the differences of the predictions from the upper  
387 and middle rows.

388           Considering the model predictions of the mean data, both models captured all the  
389 significant trends in these data. Specifically, for the central training data, both models  
390 predicted the slight expansion of the space for the central training data identical for both FPs  
391 (upper and middle row of the left-hand column), as well as the FP-dependence of the  
392 peripheral training data at the central locations (upper and middle row of the right-hand  
393 column). Most importantly, both models captured very well the difference data, which are  
394 near zero for the central training experiment and have a positive deviation for the peripheral  
395 training (bottom row). This conclusion is confirmed by the AICc evaluation which showed no  
396 evidence that either of the models should be preferred ( $\Delta AIC = 2.4$ ).

397           The data in panel B are replotted from Figure 1C, now also including the error bars.  
398 These error bars show that there was a lot of across-subject variability when the individual  
399 FPs were considered (upper and middle row), while a large portion of that variability was  
400 eliminated when the differences in biases across the FPs were computed (lower row). This  
401 illustrates why the models were fitted on the transformed data, as those were much more  
402 consistent across subjects, and, with the transformation, the fitting weighed the difference data  
403 (lower row) more as they were much more reliable. Note that the second transformed data set,  
404 the average across FPs, is not shown, as it can be easily estimated from the individual FP data  
405 in the upper two rows of panel B.

406           Panel A illustrates how the models achieved the correct prediction. Both models  
407 predicted similar saccade-related bias, consisting of expansion at the peripheral target  
408 locations ( $\pm 15^\circ$ ,  $\pm 22.5^\circ$ , and  $\pm 30^\circ$ ) and bias towards the fixation location for the central 3  
409 locations (upper row). This saccade-related bias was then modulated by the auditory space  
410 adaptation such that at the training locations the model predictions were shifted towards the  
411 AV responses, which were near zero for both the central and peripheral training (Figure A1A).  
412 The HC model predicts that this “corrective” ventriloquism shift only occurred in HC RF

413 (brown lines in the lower row of panels), while the HEC model predicts a considerable  
414 contribution of the EC RF (magenta lines at locations  $-30^\circ$  to  $-15^\circ$  at the bottom right).  
415 However that contribution only had a small effect on the overall predictions, as shown by the  
416 small differences between the brown and magenta lines in panel B.

417 ----- Insert Figure 3 around here -----

## 418 5.2 All Data simulation

419 This was the main simulation of this study. The two models were fitted on the  
420 positive-shift and negative-shift data, in addition to the no-shift data from the previous  
421 simulation (Figure 1B and C). Also, the simulation was performed on the data from both  
422 experiments. Thus it assumed that the reference frame of ventriloquism aftereffect is uniform  
423 across the audiovisual field, as the models were optimized to fit both the central and  
424 peripheral training data simultaneously. The simulation further assumed that the saccade-  
425 related component of the model accounts for all the saccade-related effects (which are EC-  
426 referenced), an assumption supported by the results of the No Shift simulation. With these  
427 assumptions, the simulation examined the hypothesis that the *RF is mixed, using visual*  
428 *signals in both head-centered and eye-centered coordinates*. This hypothesis would be  
429 confirmed if the HEC model, using both HC and EC referenced visual signals, captured the  
430 behavioral data significantly better than the HC model, which only uses HC RF for the  
431 ventriloquism adaptation of the auditory space.

432 Figure 4 presents the results of this simulation. Panel A shows the biases of the two  
433 model components for the fitted parameter values from Table 2, in a format similar to panel A  
434 of Figure 3. Panel B shows the data (circles with error bars corresponding to the standard  
435 error of the mean) and predictions of the two models (lines). Panel B shows for this  
436 simulation only the difference of Training vs. Non-training FP data, equivalent to the black

437 lines in Figure 1B and 1C. The upper row of panel B shows the no-shift data replotted from  
438 Figure 1C (also shown in the bottom row of Figure 3B), while in the lower row shows the  
439 difference between the positive-shift and negative-shift data, equivalent to a doubling of the  
440 aftereffect magnitude data from Figure 1B (black solid and dashed lines).

441         The data and model predictions addressing the main hypothesis of this simulation are  
442 in the lower row of panel B. The central training data show a large positive deviation in the  
443 middle of the target range, corresponding to the mixed reference frame, while the peripheral  
444 training data are always close to zero, an evidence of the head-centered RF. The HEC model  
445 (magenta line) approximates this pattern by predicting a positive deviation in both training  
446 regions accompanied by a negative deviation of similar size for the targets to the left of the  
447 training regions. This pattern captures the main characteristics of the data even though the  
448 predicted positive deviation is weaker than that observed for the central central-training data.  
449 On the other hand, the HC model (brown line) always predicts no deviation from zero, as that  
450 model assumes that the adaptation always occurs in the HC RF. These differences between  
451 the models confirm the hypothesis that auditory representation is adapted uniformly by visual  
452 signals in both head-center and eye-center reference frames. This conclusion is confirmed by  
453 the AICc evaluation which showed almost no support for the HC model compared to the HEC  
454 model ( $\Delta AIC = 7.9$ ).

455         The model predictions for the no-shift data (upper row of panel B) are almost identical  
456 for the two models. Thus, the difference in performance between the models cannot be  
457 explained by differences in accounting for the no-shift data. Notably, the predictions for the  
458 two training regions are fairly similar to each other, and slightly worse than those obtained in  
459 the No Shift simulation. However, they still capture the pattern of biases fairly well. Finally,  
460 note that the predictions for the average of positive and negative shift data is not shown, even  
461 though these transformed data were also used for fitting. These data were omitted as both the

462 data and model predictions are very similar to the no-shift results shown in the upper row of  
463 panel B.

464 Looking at across-subject variability in the data, the error bars in panel B tend to be  
465 smaller for the positive-vs-negative shift plots (lower row) than for the no-shift plots (upper  
466 row). This difference is in fact much larger, since the plotted error bars are for the difference  
467 between the two shift directions, whereas the aftereffect magnitude equal to half of the  
468 difference was used in the fitting. This shows that additional between-subject variability was  
469 caused by idiosyncratic biases in each subject's responses that are consistent within each  
470 subject, and which therefore cancel out when the difference between positive and negative  
471 shift data is computed. This again shows the importance of fitting the models on the  
472 transformed data, which resulted in weighing the positive-vs-negative shift difference data  
473 (lower row) even more than the no-shift training-vs-non-training FP data (upper row).

474 Panel A illustrates the behavior of individual components that resulted in the models'  
475 predictions. The saccade-related bias is almost identical for the two models (upper row), and  
476 overall similar to the pattern observed in the NoShift simulation (Figure 3A). The auditory  
477 space adaptation is broad for both models, and only slightly different between the models  
478 (magenta vs. brown lines between in the lower row of Figure 4B). The size of the difference is  
479 mainly determined by parameter  $w_E$  (see Table 2) which defines the relative contribution of  
480 the eye-centered vs. head-centered RF to the combined representation in the HEC model (in  
481 this simulation  $w_E = 0.15$ , indicating that the EC RF only had a 15% weight in the mixed  
482 reference frame). So, it can be concluded that even though this contribution is highly  
483 significant, the HC RF has still a dominant role when uniform representation of the auditory  
484 space is assumed.

485 ----- Insert Figure 4 around here -----

486 *5.3 Central and Peripheral Data simulations*

487 Two additional simulations were performed, each of them fitting separately the data  
488 for only one training region. The main goal of the simulations was to verify that, when the  
489 models are fitted to the two data sets separately, they will confirm the conclusions of the  
490 behavioral experiments about the mixed reference frame for the central-training data and the  
491 head-centered reference frame for the peripheral-training data. Additionally, these simulations  
492 only fitted the transformed positive-shift and negative-shift data, while also producing model  
493 predictions for the no-shift data. Thereby, the simulations tested whether the behavior of the  
494 saccade-related model component observed in the previous simulations is dependent on the  
495 presence of the no-shift data, or whether the models would find a similar predicted pattern  
496 even if only the positive/negative shift data are considered.

497 Central Data simulation fitted only the central-training data from the positive-shift and  
498 negative-shift conditions (dashed lines in Figure 1B). The main hypothesis tested in the  
499 simulation was that the *RF is mixed when VAE is induced in the central region*. This  
500 hypothesis would be confirmed if the HEC model is significantly better than the HC model.  
501 Figure 5 presents the results of this simulation using a layout identical to Figure 4. The lower  
502 row of panel B shows the predictions of the two models for the difference data. As expected,  
503 the HEC model (magenta) fits the central-training data well (better than in the All Data  
504 simulation) while the HC model's prediction (brown) is again fixed at zero. This difference  
505 confirms the hypothesis that the EC RF contributes significantly to the ventriloquism  
506 adaptation in central region, a conclusion also confirmed by the AICc evaluation (HEC model  
507 better than HC model;  $\Delta AIC = 5.9$ ). However, it is also noticeable that the HEC model  
508 underestimates the central data for targets at azimuths around  $0^\circ$  while it predicts a negative  
509 deviation at azimuths around  $-20^\circ$ , not observed in the data. This negative deviation is due to  
510 the structure of the model which always predicts that a positive deviation is accompanied by a

511 negative deviation at locations shifted in the direction of the new, non-training FP location.  
512 For the peripheral experiment, the HEC model predictions depart considerably from the data,  
513 as expected since the data do not show a strong EC RF contribution. On the other hand, for  
514 the no-shift data, both models largely capture the main trends even though they were not fitted  
515 on these data (upper row of panel B), confirming that the FP-dependent adaptation observed  
516 in the no-shift data is not specific to these data as the model generalizes to predict it even if  
517 only trained on the positive and negative shift data.

518         Considering the individual model components (Panel A), the results are overall similar  
519 to the All Data simulation (Figure 4). The main difference in the current simulation is that the  
520 EC-referenced contribution to auditory spatial adaptation in the HEC model is considerably  
521 stronger, resulting in larger differences between the two models (bottom row). However, even  
522 here the HC RF still has more weight ( $w_E = 0.3$  in Table 2), suggesting that it is the more  
523 dominant RF for ventriloquism aftereffect in general.

524         ----- Insert Figure 5 around here -----

525         Peripheral Data simulation fitted only the peripheral-training data from the positive-  
526 shift and negative-shift conditions (dashed lines in Figure 1B). The main goal was to confirm  
527 the hypothesis that the *RF is head-centered when VEA is induced in the peripheral region*, in  
528 agreement with the behavioral results. This hypothesis would be confirmed if the HEC and  
529 HC models performed similarly in the simulation.

530         Figure 6 presents the results of this simulation using a layout identical to Figure 4. The  
531 lower row of panel B shows the predictions of the two models for the positive vs. negative  
532 shift difference data. As expected, both models fit the near-zero peripheral-training data well,  
533 while failing to predict the central-training data. This confirms that the EC RF does not  
534 contribute to the ventriloquism adaptation in the peripheral region, a conclusion also  
535 supported by the AICc evaluation, in which the HC model is better than the HEC model;

536  $\Delta AIC = 5.6$  in Table 2). Similar to the Central Data simulation, for the no-shift data, both  
537 models largely captured the main trends even though they were not fitted on these data (upper  
538 row of panel B). These results are also confirmed when considering the individual model  
539 components (Panel A). First, the saccade-related bias component (upper row) again behaves  
540 identically in the two models similarly to the previous simulations. Second, the auditory space  
541 adaptation component (lower row) behaves nearly identically for the two models, determined  
542 by the low the relative weight of the EC RF in the HEC model ( $w_E = 0.04$  in Table 2).

543 ----- Insert Figure 6 around here -----

#### 544 *5.4 Model parameter values*

545 The behavior of the models in different conditions can be analyzed by looking at the  
546 fitted values of the model parameters. Here, the first main modeling question concerned the  
547 ability of the models to predict the EC-dependence of the no-shift data observed in the  
548 peripheral, but not in the central, training condition. The critical model parameters here are  
549 the parameters  $h$  and  $w$ , which determine the relative strength of the saccade-related and  
550 auditory space adaptation components of the model (Figure A1 and Table 2). The values of  
551 the two parameters are overall similar in all simulations, suggesting that both components  
552 contributed critically to all the predictions.

553 The parameter  $w_E$  determined the relative strength of the EC RF contribution to the  
554 ventriloquism-driven auditory spatial adaptation, while the parameters  $\sigma_H$  and  $\sigma_E$  determined,  
555 respectively, how broad-vs-specific was the influence of the HC and EC RFs. The value of  
556  $w_E$  was always much smaller than 0.5 (in relevant simulations smaller or equal to 0.3) and  $\sigma_H$   
557 was always much larger than  $\sigma_E$ . Both these observations indicate that while the EC-  
558 referenced signals influence the ventriloquism adaptation significantly, their effect is mostly  
559 modulatory, while the HC-referenced signals dominate.



560 Finally, the fitted values of parameters  $k$  and  $c$  did not change dramatically across the  
561 simulations, always resulting in similar predictions about the saccade-related bias component  
562 of the model.

## 563 **6. Summary and Discussion**

564 The HC/HEC model introduced here aims to characterize the reference frame in which  
565 auditory and visual signals are combined to induce the ventriloquism aftereffect. It focuses on  
566 the experimental data in which ventriloquism was induced locally in either the audiovisual  
567 center or periphery, in which a change in fixation point was used to dissociate the head-center  
568 from eye-centered reference frames, and in which saccades were used for responding during  
569 training and testing [12, 13]. The model assumes a population of adaptive units representing  
570 the auditory space with auditory and visual inputs, similar to the channel processing model  
571 proposed in [21]. However, instead of explicitly implementing a population of units, it  
572 describes the adaptive effects by only considering the locations from which the auditory  
573 components of audiovisual training stimuli were presented. Then, for each unit there is a  
574 Gaussian neighborhood in which the AV training affects the A-only responses in either HC-  
575 only RF (HC model) or in a combined HC+EC RF (HEC model). Also, the model assumes  
576 that there are intrinsic biases associated with auditory saccade responses, and that the effect of  
577 ventriloquism is to shift the auditory-only responses from these saccade-related biases  
578 towards the locations of the responses on the audiovisual training trials.

579 Since the model only uses the responses on audiovisual training trials to guide  
580 adaptation, independent of the direction of audiovisual disparity used during training, and  
581 independent of whether the adaptation results in hypometric or hypermetric saccades, it is  
582 assumed that there is a direct relation between the audiovisual responses during training and  
583 the auditory-only responses during testing. Specifically, the assumed relationship is that the

584 ratio of observed ventriloquism aftereffect to the observed ventriloquism effect is constant, as  
585 confirmed by our behavioral data analysis (see Appendix) which found a ratio of  
586 approximately 0.5. This ratio is not aftereffect by whether the aftereffect results in hypometric  
587 or hypermetric saccades, consistent with Pages and Groh [17]. However, the analysis also  
588 found that there is an asymmetry in the ventriloquism effect when measured using audiovisual  
589 saccades. Specifically, the effect reaches 100% of audio-visual disparity if resulting in  
590 hypometric saccades, while it is only 80% of the disparity when resulting in hypermetric  
591 saccades. Future studies will need to determine whether there is really a difference in the  
592 presence/absence of the hypo/hypermetric asymmetry when saccades are used for  
593 ventriloquism effect and aftereffect measurement, or whether the current results are different  
594 for the effect vs. aftereffect only because the aftereffect data are noisier.

595         The four simulations presented here showed that the HC/HEC model can describe the  
596 different phenomena observed in the Kopco et al. [12, 13] studies. First, in the No-Shift  
597 simulation, the simpler HC model accurately predicted the newly reported adaptation by AV-  
598 aligned stimuli [13] as a combination of the intrinsically present saccade-related biases locally  
599 “corrected” by the visually guided adaptation at the training locations. Thus, the model  
600 predicts that this AV-aligned adaptation for the peripheral-training data is purely driven by  
601 some adaptive processes affecting the motor representations related to audiovisual/auditory  
602 saccades. This, as well as the existence of the saccade-related bias component of the model,  
603 can be tested in future studies, as the currently available data are not consistent as to whether  
604 auditory saccades are predominantly hypermetric or hypometric [16, 18]. Both these  
605 predictions can be experimentally tested by performing ventriloquism experiments in which  
606 saccades are not used for responding [22].

607         The second, All Data simulation addressed the main question of this study about the  
608 reference frame of the ventriloquism aftereffect. Its results provide an evidence that a uniform

609 auditory spatial representation uses a mixed reference frame, with visual signals adapting the  
610 auditory spatial representation in both head-centered and eye-centered RFs, as implemented in  
611 the HEC model and consistent with physiological studies [23, 24]. Importantly, the current  
612 results suggest that, in the mixed frame, the relative contribution of the EC RF is only 15% vs.  
613 85% for the HC RF. Moreover, even when only the central-training data are considered  
614 (Central-Data simulation), the relative contribution of the EC only reaches 30%. Thus, the HC  
615 RF is always dominant for the ventriloquism aftereffect adaptation, an observation that is  
616 further supported by the comparison of the fitted sigma parameters (which showed that the  
617 HC-referenced adaptation is more broad than the EC-referenced adaptation). The second  
618 simulation also showed that the model in its current form always predicts the same difference  
619 in biases between the FPs, independent of the training region. This effect is mainly due to the  
620 implicit model assumption that the distribution of the spatial channels is uniform across space.  
621 If the model assumed a denser representation of space near the midline (e.g., see [25]), it  
622 could predict adaptation that is stronger in the center than in the periphery.

623         Importantly, the current model was fitted on data transformed so that the differences  
624 between the two FPs and differences between the positive and negative shift data were used.  
625 This was particularly critical for this simulation in which the EC contribution is visible when  
626 the double difference is computed, and it was also important since, in this representation, a lot  
627 of noise in the data is removed. Note that when the All data simulation was repeated on  
628 untransformed data, the AICc evaluation did not find a significant difference between the HC  
629 and HEC models, since the across-subject variability in the responses considered separately  
630 for the two FPs was too large, dominating over the differences between the FPs critical to  
631 evaluate the reference frames (data not shown).

632         The final two simulations examined the model behavior when fitted separately to the  
633 central vs. peripheral training data. In both simulations the model predictions were in

634 agreement with the behavioral data. Specifically, the HEC model using a mixed reference  
635 frame better predicted the central data, while the HC model using the head-centered reference  
636 frame better predicted the peripheral data. The central-data simulation also showed one  
637 weakness of the model: in its current form it always predicts that if there is a region in which  
638 VAE magnitude is larger for the training-FP than non-training-FP data, then there also has to  
639 be a region in which the relationship is reversed. An extension of the model which would  
640 make the strength of the adaptation depend not only on the distance from the training stimuli,  
641 but also on the distance from the training FP, could correct this discrepancy.

642         Finally, the Central and Peripheral Data simulations accurately captured the no-shift  
643 data, even though the models were not fitted on them, confirming that the pattern of  
644 adaptation exhibited in these data is also present in the positive-shift and negative-shift data  
645 from which it can generalize to the no-shift data. However, as discussed above, the no-shift  
646 data biases are most likely related to the saccade responses, not to the spatial representation  
647 adapted by ventriloquism, which is of primary interest here.

648         The neural mechanisms of the ventriloquism aftereffect and its reference frame are not  
649 well understood. Cortical areas involved in ventriloquism aftereffect likely include Heschl's  
650 gyrus, planum temporale, intraparietal sulcus, and inferior parietal lobule [26-29]. Multiple  
651 studies found some form of hybrid representation or mixed auditory and visual signals in  
652 several areas of the auditory pathway, including the inferior colliculus [30], primary auditory  
653 cortex [31], the posterior parietal cortex [23, 32, 33], as well as in the areas responsible for  
654 planning saccades in the superior colliculus and the frontal eye fields [34, 35]. In the current  
655 model, the saccade-related component likely corresponds to the saccade-planning areas. The  
656 auditory space representation component likely corresponds to the higher auditory cortical  
657 areas or the posterior parietal areas, not the primary cortical areas. This can be expected  
658 because there is growing evidence that, in mammals, auditory space is primarily encoded non-

659 homogeneously, based on two spatial channels roughly aligned with the left and right  
660 hemifields of the horizontal plane [14, 15, 36-38] and the ventriloquism adaptations modeled  
661 here are local (within a hemifield or just in the central region), not consistent with broad  
662 adaptation predicted by the hemifield code. However, note that there are also theories which  
663 incorporate additional channels, such as a central channel, in addition to the hemifield  
664 channels [39]. Such extended models might be compatible with the current data.

665       Even though most previous recalibration studies examined the aftereffect on the time  
666 scales of minutes [1, 2, 40, 41], recent studies demonstrated that it be elicited very rapidly,  
667 e.g., by a single trial with audio-visual conflict [42]. If it is the case that the adaptive  
668 processes underlying the ventriloquism aftereffect occur on multiple time scales, as also  
669 suggested in several models of slower ventriloquism aftereffect [6, 7], then an open question  
670 is whether the reference frame is the same at the different scales or whether it is different. The  
671 current results are mostly applicable to the slow adaptation on the time scale of minutes, while  
672 the RF on the shorter time scales has not been previously explored.

673       In summary, while some previous models considered the reference frame of the  
674 ventriloquism effect [9, 10], the current HC/HEC model is, to our knowledge, the first one to  
675 focus on the RF of the ventriloquism aftereffect. In addition, it also considers how saccade-  
676 related adaptation might influence auditory saccades. In the future, it can be combined with  
677 the existing models of spatial and temporal characteristics of the ventriloquism aftereffect to  
678 obtain a more general model of this important multisensory phenomenon.

679

## 680 **Acknowledgments**

681       This work was supported by VEGA-1/0355/20 and VVGS UPJS VVGS-2020-1514.

682

683

684 **References and links**

- 685 1. Recanzone, G.H., *Rapidly induced auditory plasticity: The ventriloquism aftereffect*.  
686 Proceedings of the National Academy of Sciences of the United States of America,  
687 1998. 95(3): p. 869-875.
- 688 2. Woods, T.M. and G.H. Recanzone, *Visually Induced Plasticity of Auditory Spatial*  
689 *Perception in Macaques*. Current Biology, 2004. 14: p. 1559-1564.
- 690 3. Bertelson, P., et al., *The aftereffects of ventriloquism: Patterns of spatial*  
691 *generalization*. Perception and Psychophysics, 2006. 68(3): p. 428-436.
- 692 4. Haessly, A., J. Sirosh, and R. Miikkulainen. *A model of visually guided plasticity of*  
693 *the auditory spatial map in the barn owl*. in *Seventeenth Annual Meetings of the*  
694 *Cognitive Science Society*. 1995. Pittsburgh, PA: Erlbaum.
- 695 5. Oess, T., M.O. Ernst, and H. Neumann, *Computational principles of neural*  
696 *adaptation for binaural signal integration*. PLOS Comput Biol, 2020. 16(7).
- 697 6. Bosen, A.K., et al., *Multiple time scales of the ventriloquism aftereffect*. PLoS ONE,  
698 2018. 13(8).
- 699 7. Watson, D.M., et al., *Distinct mechanisms govern recalibration to audio-visual*  
700 *discrepancies in remote and recent history*. Sci Rep, 2019. 9.
- 701 8. Shinn-Cunningham, B.G., N. Kopco, and T.J. Martin, *Localizing nearby sound*  
702 *sources in a classroom: Binaural room impulse responses*. Journal of the Acoustical  
703 Society of America, 2005. 117(5): p. 3100-3115.

- 704 9. Razavi, B., W.E. O'Neill, and G.D. Paige, *Auditory Spatial Perception Dynamically*  
705 *Realigns with Changing Eye Position*. Journal of Neuroscience, 2007. 27: p. 10249-  
706 10258.
- 707 10. Pouget, A., S. Deneve, and J.R. Duhamel, *A computational perspective on the neural*  
708 *basis of multisensory spatial representations*. Nature Reviews Neuroscience, 2002. 3:  
709 p. 741-747.
- 710 11. Groh, J.M. and D.L. Sparks, *Two models for transforming auditory signals from head-*  
711 *centered to eye-centered coordinates*. Biological Cybernetics, 1992. 67: p. 291-302.
- 712 12. Kopco, N., et al., *Reference Frame of the Ventriloquism Aftereffect*. Journal of  
713 Neuroscience, 2009. 29(44): p. 13809-13814.
- 714 13. Kopco, N., et al., *Hemisphere-specific properties of the ventriloquism aftereffect*. J  
715 Acoust Soc Am, 2019. 146(2): p. EL177-183.
- 716 14. Grothe, B., M. Pecka, and D. McAlpine, *Mechanisms of sound localization in*  
717 *mammals*. Physiol Rev 2010. 90: p. 983-1012.
- 718 15. Groh, J.M., *Making space: how the brain knows where things are*. Cambridge, MA:  
719 Harvard University Press., 2014.
- 720 16. Yao, L. and C.K. Peck, *Saccadic eye movements to visual and auditory targets*. Exp  
721 Brain Res, 1997. 115: p. 25-34.
- 722 17. Pages, D.S. and J.M. Groh, *Looking at the Ventriloquist: Visual Outcome of Eye*  
723 *Movements Calibrates Sound Localization*. Plos One, 2013. 8(8).



- 724 18. Gabriel, D.N., D.P. Munoz, and S.E. Boehnke, *The eccentricity effect for auditory*  
725 *saccadic reaction times is independent of target frequency*. Hearing Res, 2010. 262: p.  
726 19-25.
- 727 19. Burnham, K.P. and D.R. Anderson, *Multimodel Inference Understanding AIC and*  
728 *BIC in Model Selection*. Sociological Methods & Research, 2004. 33(2): p. 261-304.
- 729 20. Taboga, M., *Normal distribution - Maximum Likelihood Estimation*, in *Lectures on*  
730 *probability theory and mathematical statistics, Third edition*. Kindle Direct  
731 *Publishing*.2017.
- 732 21. Carlile, S., S. Hyams, and S. Delaney, *Systematic distortions of auditory space*  
733 *perception following prolonged exposure to broadband noise*. Journal of the  
734 Acoustical Society of America, 2001. 110(1): p. 416-424.
- 735 22. Kopco, N., et al., *Contextual plasticity, top-down, and non-auditory factors in sound*  
736 *localization with a distractor*. Journal of the Acoustical Society of America, 2015.  
737 137(EL281-287).
- 738 23. Mulette-Gillman, O.A., Y.E. Cohen, and J.M. Groh, *Eye-centered, head-centered,*  
739 *and complex coding of visual and auditory targets in the intraparietal sulcus*. Journal  
740 of Neurophysiology, 2005. 94: p. 2331-2352.
- 741 24. Porter, K.K. and J.M. Groh, *The "other" transformation required for visual-auditory*  
742 *integration: representational format*. Progress in Brain Research, 2006. 155: p. 313-  
743 23.

- 744 25. Stern, R.M. and G.D. Shear, *Lateralization and detection of low-frequency binaural*  
745 *stimuli: Effects of distribution of internal delay*. Journal of the Acoustical Society of  
746 America, 1996. 100(4): p. 2278-2288.
- 747 26. van der Heijden, K., et al., *Cortical mechanisms of spatial hearing*. Nature Reviews  
748 Neuroscience, 2019. 20: p. 609-623.
- 749 27. Zatorre, R.J., et al., *Where is 'where' in the human auditory cortex?* Nat Neurosci,  
750 2002. 5(9): p. 905-9.
- 751 28. Zierul, B., et al., *The role of auditory cortex in the spatial ventriloquism aftereffect*.  
752 Neuroimage, 2017. 162: p. 257-268.
- 753 29. Michalka, S.W., et al., *Auditory spatial coding flexibly recruits anterior, but not*  
754 *posterior, visuotopic parietal cortex*. Cerebral Cortex, 2016. 26(3): p. 1302-1308.
- 755 30. Zwiers, M.P., H. Versnel, and A.J. Van Opstal, *Involvement of monkey inferior*  
756 *colliculus in spatial hearing*. J Neurosci, 2004. 24(17): p. 4145-56.
- 757 31. Werner-Reiss, U., et al., *Eye position affects activity in primary auditory cortex of*  
758 *primates*. Current Biology, 2003. 13: p. 554-562.
- 759 32. Duhamel, J.-R., et al., *Spatial invariance of visual receptive fields in parietal cortex*  
760 *neurons*. Nature, 1997. 389: p. 845-848.
- 761 33. Mulette-Gillman, O.A., Y.E. Cohen, and J.M. Groh, *Motor-related signals in the*  
762 *intraparietal cortex encode locations in a hybrid, rather than eye-centered, reference*  
763 *frame*. Cerebral Cortex, 2009. in press.

- 764 34. Wallace, M.T. and B.E. Stein, *Cross-modal synthesis in midbrain depends on input*  
765 *from cortex*. Journal of Neurophysiology, 1994. 71(1): p. 429-432.
- 766 35. Schiller, P.H., S.D. True, and J.L. Conway, *The effects of frontal eye field and*  
767 *superior colliculus ablations on eye movement*. Science, 1979. 206: p. 590-592.
- 768 36. Stecker, G.C., I.A. Harrington, and J.C. Middlebrooks, *Location Coding by Opponent*  
769 *Neural Populations in the Auditory Cortex*. PLoS Biology, 2005. 3(3): p. e78.
- 770 37. McAlpine, D., D. Jiang, and A.R. Palmer, *A neural code for low-frequency sound*  
771 *localization in mammals*. Nature Neuroscience, 2001. 4(4): p. 396-401.
- 772 38. Salminen, N.H., et al., *A population rate code of auditory space in the human cortex*. .  
773 PLoS One 2009. 4:e7600.
- 774 39. Dingle, R.N., S.E. Hall, and D.P. Phillips, *The three-channel model of sound*  
775 *localization mechanisms: interaural level differences*. J Acoust Soc Am, 2012. 131(5):  
776 p. 4023-9.
- 777 40. Radeau, M. and P. Bertelson, *The after-effects of ventriloquism*. Quarterly Journal of  
778 Experimental Psychology, 1974. 26: p. 63-71.
- 779 41. Radeau, M. and P. Bertelson, *The effect of a textured visual field on modality*  
780 *dominance in a ventriloquism situation*. Perception and Psychophysics, 1976. 20: p.  
781 227-235.
- 782 42. Wozny, D.R. and L. Shams, *Recalibration of Auditory Space following Milliseconds*  
783 *of Cross-Modal Discrepancy*. Journal of Neuroscience, 2011. 31(12): p. 4607-4612.

785 **Appendix**

786 To examine whether auditory saccades used for responding have properties that might  
787 be important for the current modeling, responses to auditory and audiovisual stimuli in the  
788 training regions of both experiments were further analyzed (FigureA1). Two questions were  
789 addressed. First, we examined whether the observed saccades were longer or shorter  
790 depending on whether the presence of visual component/adaptation resulted in saccades that  
791 were hypometric (shorter than needed to reach the auditory target) or hypermetric (longer than  
792 needed to reach the auditory target). Such asymmetry, if observed, would suggest that some of  
793 the effects described in Section 2, e.g., the eye-centered RF effects, might have been caused  
794 by the saccade responses. Second, we evaluated whether the ratio of the magnitudes in  
795 auditory-only responses to the respective AV responses for a given AV stimulus is constant  
796 for all combinations of audiovisual stimuli. If that is the case, then, independent of any  
797 possible hypo/hypermetric dependence, the model can assume that the predicted  
798 ventriloquism aftereffect is directly related to the measured ventriloquism effect.

799 FigureA1A shows the biases in saccade responses from the training FP for targets in  
800 the training regions from both experiments (circles vs. squares). Open symbols represent  
801 audio-visual responses, filled symbols auditory-only responses. Black symbols represent the  
802 AV-aligned runs, while the cyan and magenta symbols represent, respectively, the runs in  
803 which the response shifts towards the visual component/adaptation resulted in saccades that  
804 were hypometric and hypermetric. Specifically, the magenta circles represent the central-  
805 training data with visual component shifted to the right, i.e., towards the fixation point, while  
806 the magenta squares represent the peripheral-training data with visual component shifted to  
807 the left, i.e., again towards the fixation point (the cyan data then represent the corresponding  
808 data for visual components shifted in the opposite direction). Note that the filled symbols here  
809 show the same data as the red lines in the training regions of Figure 1B, C.

810           The black symbols in FigureA1A show that, in both experiments, all the saccades in  
811 the AV-aligned runs were fairly accurate. Specifically, responses to the AV stimuli were  
812 within  $\pm 0.5^\circ$  (open black symbols) while the saccades to the auditory targets (filled black  
813 symbols) tended to be hypometric (rightward bias for targets to the left of the FP and leftward  
814 for the targets to the right) by up to  $1^\circ$ , except for one data point ( $7.5^\circ$ ), discussed in detail  
815 later.

816           Comparison of the respective magenta and cyan symbols shows that the adaptation  
817 direction (i.e., visual component displacement) that led to hypometric saccades tended to  
818 result in larger biases than the direction leading to hypermetric saccades (for example, all the  
819 magenta filled circles are clustered around the value of 3, while the corresponding cyan filled  
820 circles are around -1). To analyze this asymmetry while accounting for the biases in the AV-  
821 aligned responses, FigureA1B shows the hypometric and hypermetric data from panel A  
822 referenced to the respective baselines and plotted such that positive values always represent  
823 bias in the direction of the visual component displacement (i.e., all the cyan squares and  
824 magenta squares had their signs flipped after subtracting the baseline). The magenta open  
825 symbols show that, independent of the training region, the VE responses measured in  
826 conditions resulting in hypometric saccades were aligned with the visual component (which  
827 was separated by  $5^\circ$ ), while the responses resulting in hypermetric saccades (open cyan  
828 symbols) only reach approximately 80% of the visual component displacement. A mixed  
829 ANOVA with a between-subject factor of Experiment (Central, Peripheral) and within-subject  
830 factors of Shift Direction (Hypometric, Hypermetric), and Azimuth (Small, Medium, Large)  
831 performed on these data confirmed these results, showing a significant main effect of shift  
832 direction ( $F(1,12) = 5.78$ ;  $p = 0.033$ ). The ANOVA also found a significant Azimuth X  
833 Experiment interaction ( $F(2,24) = 9.71$ ;  $p = 0.006$ ) reflecting a dependence of the effect on the  
834 target location that is not further considered here, and no other significant main effects or

835 interactions ( $p > 0.1$ ). On the other hand, for the VAE data, no significant difference between  
836 hypometric and hypermetric saccades was observed (a similar ANOVA on these data only  
837 found a main effect of Azimuth;  $F(2,24) = 7.94$ ;  $p = 0.002$ ). Thus, the strong asymmetry  
838 between the hypometric and hypermetric AV data in in panel A (filled cyan vs. magenta  
839 symbols) can be ascribed to overall hypometry of the auditory saccades exhibited also by the  
840 No-Shift data (black filled symbols). Also note that there is one hypermetric AV data point  
841 for which the response referenced to baseline is near 0 (left-most filled cyan circle), not  
842 following the pattern observed for all the other points. Most likely, this inconsistency is  
843 caused by some specific characteristic of the baseline auditory-only saccades, as this point  
844 corresponds to the only black filled symbol that shows hypermetry instead of hypometry in  
845 panel A (the black filled circle at the  $7.5^\circ$  location).

846 Finally, panel C shows the observed VAE as a proportion of the observed VE (i.e.,  
847 each symbol in panel C shows the ratio of the corresponding filled and open symbols from  
848 panel B). In this analysis, one subject was identified as outlier (in at least one data point the  
849 subject differed from the across-subject mean by more than 3 standard deviations). This  
850 subject is plotted separately (crosses) and not included in the across-subject graphs. For the  
851 remaining subjects, FigureA1C shows that there is a constant relationship between the  
852 induced ventriloquism effects and aftereffects such that the aftereffect is always  
853 approximately one half of the effect (with a slight tendency to grow with the target  
854 amplitude), independent of whether the shift is hypo/hypermetric or of the training region.  
855 Confirming this observation, ANOVA with the same factors as above only found a main  
856 effect of Azimuth ( $F(2,22)=10.34$ ,  $p=0.0007$ ). The only other factor that approached  
857 significance was Training Region ( $F(1, 11)=3.83$ ,  $p=0.076$ ) while all the other factors and  
858 interactions were not significant ( $p > 0.15$ ). These results are used in the current modeling in

859 which it is assumed that there is a constant relationship between the induced ventriloquism

860 effect and aftereffect, independent of whether the induced shift is hypometric or hypermetric.

861 ----- Insert Figure A1 around here -----

862

863 **Table 1: The range and increments of values of free parameters used in systematic search**  
864 **through the parameter space during model simulations. Ten values of each parameter were considered**  
865 **with either linear or quadratic spacing. Note that parameters  $w_E$  and  $\sigma_E$  are not used in the HC model,**  
866 **while all parameters are used in the HEC model.**

| Parameter            | Range |     | Increments |
|----------------------|-------|-----|------------|
|                      | min   | max |            |
| $h, w$               | 0     | 2   | linear     |
| $k$                  | 0.01  | 20  | quadratic  |
| $c$                  | 0     | 1.5 | quadratic  |
| $w_E$                | 0     | 1   | linear     |
| $\sigma_H, \sigma_E$ | 1     | 20  | linear     |

867

868



869 **Table 2: Values of fitted model parameters and evaluation of model performance for each**  
 870 **simulation. AICc states the criterion for a given simulation,  $\Delta$ AIC is the increase in AICc for a given**  
 871 **simulation *re.* the simulation on a given data with the minimum AICc. The underscored model names**  
 872 **indicate the model for which there is a substantial evidence of being a better fit for the data (rounded up**  
 873 **value of  $\Delta$ AIC smaller than 2).**

| Simulation                             | Model      | Fitted parameter values |      |      |      |       |            |            | Performance |              |
|----------------------------------------|------------|-------------------------|------|------|------|-------|------------|------------|-------------|--------------|
|                                        |            | $h$                     | $k$  | $c$  | $w$  | $w_E$ | $\sigma_H$ | $\sigma_E$ | AICc        | $\Delta$ AIC |
| <b>No Shift</b><br><b>(Figure 3)</b>   | HC         | 1.03                    | 0.31 | 1.14 | 1.01 | -     | 12.06      | -          | 130.90      | 2.36         |
|                                        | <u>HEC</u> | 1.13                    | 0.17 | 0.95 | 1.24 | 0.36  | 12.84      | 2.98       | 128.54      | -            |
| <b>All Data</b><br><b>(Figure 4)</b>   | HC         | 0.79                    | 0.82 | 1.15 | 0.49 | -     | 14.21      | -          | 444.75      | 7.86         |
|                                        | <u>HEC</u> | 0.77                    | 0.76 | 1.13 | 0.53 | 0.15  | 13.35      | 4.83       | 436.89      | -            |
| <b>Central</b><br><b>(Figure 5)</b>    | HC         | 1.01                    | 5.64 | 0.67 | 0.40 | -     | 18.79      | -          | 176.16      | 5.92         |
|                                        | <u>HEC</u> | 0.96                    | 5.60 | 0.67 | 0.48 | 0.30  | 18.14      | 5.01       | 170.24      | -            |
| <b>Peripheral</b><br><b>(Figure 6)</b> | <u>HC</u>  | 0.83                    | 3.40 | 1.33 | 0.55 | -     | 12.43      | -          | 136.33      | -            |
|                                        | HEC        | 0.82                    | 5.33 | 1.33 | 0.56 | 0.04  | 12.12      | 4.91       | 141.89      | 5.56         |

874

875

876 **Figure Captions**

877

878 **Figure 1: Experimental design and predicted and observed ventriloquism aftereffect from Kopco**  
879 **et al. [12, 13]. A) Setup: nine loudspeakers were evenly distributed at azimuths from  $-30^\circ$  to  $30^\circ$ . Two**  
880 **fixation points were used, located  $10^\circ$  below the loudspeakers at  $\pm 11.25^\circ$ . On training trials, audiovisual**  
881 **stimuli were presented either from the central region [12] or peripheral region [13], while the subject**  
882 **fixated one FP. The audiovisual stimuli consisted of a sound paired with an LED offset by  $-5^\circ$ ,  $0^\circ$ , or  $-5^\circ$**   
883 **(offset direction fixed within a session). On interleaved probe trials, the sound was presented from any of**  
884 **the loudspeakers while the eyes fixated either one of the FPs. B) Predicted (left-hand panels) and observed**  
885 **(right-hand panels) reference frames of the ventriloquism aftereffect. Lines represent model predictions**  
886 **or across-subject means of the aftereffect magnitudes for the probe trials from the AV-misaligned runs.**  
887 **C) Across-subject mean aftereffect magnitudes for the probe trials from the AV-aligned runs. Note: Error**  
888 **bars have been omitted for clarity. They are presented in the simulation figures in which data are**  
889 **compared to models.**

890

891 **Figure 2: Structure of the HC/HEC model and illustration of its operation. A) Block diagram of**  
892 **the model. The model predicts the response bias as a function of the probe stimulus location, with**  
893 **additional input parameters of the fixation position, training locations, and the observed ventriloquism**  
894 **effect at the training locations (rounded blocks). Two mechanisms determine the response (square blocks).**  
895 **First, saccade-related bias is always present and it is not influenced by the ventriloquism signals. Second,**  
896 **auditory space representation which is adapted by ventriloquism only in HC reference frame (HC model;**  
897 **“HC” arrow) or in a combination of HC and EC RFs (HEC model; “HC” and “EC” arrow). Labels B, C,**  
898 **D within blocks refer to respective panels below that illustrate the function of the blocks by showing the**  
899 **outputs of the model components in an illustrative simulation (for training in the central region for which**  
900 **the observed AV responses are nearly unbiased). B) Saccade-related bias predictions for the two fixation**  
901 **points (red and blue lines). The green diamonds show the nearly zero ventriloquism effect assumed for the**  
902 **predictions shown in panel C. C) Adaptation of auditory space representation resulting from the saccade-**  
903 **related bias and AV response bias as shown in panel B. Diamonds represent the disparity between AV**  
904 **response bias and saccade-related bias for the training FP (red), and non-training FP in HC RF (blue**

905 filled) and in EC RF (blue open). Lines represent predictions of auditory space adaptation induced by  
906 these disparities. D) Response bias predicted by the model as a weighted combination of biases shown in  
907 panels B and C. Values of model parameters used for the predictions of respective model components are  
908 shown along the upper frame in each panel.

909

910 **Figure 3: Model predictions and data for the No-Shift simulation. A) Visualization of the two**  
911 **model components, Saccade-Related Bias and Auditory Space Adaptation, for the HC and HEC models**  
912 **with the parameters fitted to the no-shift data (from Table 2). The Saccade-related Bias component (upper**  
913 **row) is independent of any visually guided ventriloquism adaptation. The Auditory Space Adaptation**  
914 **component (lower row) shows the strength with which the ventriloquism induced by the AV stimuli at 3**  
915 **central locations shifts the responses from the Saccade-Related Bias locations to the AV response locations**  
916 **(Eq. 3). Note that for peripheral-training data, i.e., for the AV stimuli at the locations of 15°-30°, the**  
917 **lower-row graphs would be shifted by 22.5° to the right. B) Across-subject mean biases ( $\pm$ standard error**  
918 **of the mean) and model predictions for the two fixation locations (upper and middle row) and the**  
919 **difference between the two fixations (lower row).**

920

921 **Figure 4: Model predictions and data for the All Data simulation. A) Visualization of the two**  
922 **model components, Saccade-Related Bias and Auditory Space Adaptation, for the HC and HEC models**  
923 **with the parameters fitted to all the data (from Table 2). For detailed description see the caption for panel**  
924 **A of Fig. 3. B) Across-subject mean difference in biases from the training FP vs. non-training FP**  
925 **( $\pm$ standard error of the mean) and model predictions for the no-shift data, and for the aftereffect**  
926 **magnitude computed as a difference between positive-shift and negative-shift data (lower row).**

927

928 **Figure 5: Model predictions and data for the Central Data simulation. For detailed description,**  
929 **see the caption of Figure 4.**

930

931 **Figure 6: Model predictions and data for the Peripheral Data simulation. For detailed**  
932 **description, see the caption of Figure 4.**

933

934 **Figure A1: Saccade responses to audiovisual and auditory stimuli in the training regions from**  
935 **both experiments. A) Across-subject mean saccade end points as a function of the location of the auditory**  
936 **target or of the auditory component of the audio-visual target. Data are plotted separately for the auditory**  
937 **and audio-visual stimuli, for the two training regions, and for the three directions of the visual component**  
938 **displacement (aligned, shifting the auditory saccade to be hypometric, shifting the auditory saccade to be**  
939 **hypermetric). Note that a hypometric shift corresponds to visual component shifted to the right for the**  
940 **central-training data and to visual component shifted to the left for the peripheral training data (and vice**  
941 **versa for the hypermetric shift). B) Strength of the induced ventriloquism effect and aftereffect shown as**  
942 **the across-subject mean bias in response towards the visual component re. response in no-shift baseline**  
943 **(i.e., difference between the respective magenta/cyan and black symbols from panel A with the sign**  
944 **flipped for the negative-shift data). C) Ventriloquism aftereffect as a proportion of ventriloquism effect**  
945 **shown as the across-subject mean ratio of the VE/VAE strengths from panel B. Note that one outlier**  
946 **subject is plotted separately from the across-subject means in this analysis. Error bars represent across-**  
947 **subject standard errors of the means (N=7 in both experiments).**

948

A) Experimental design

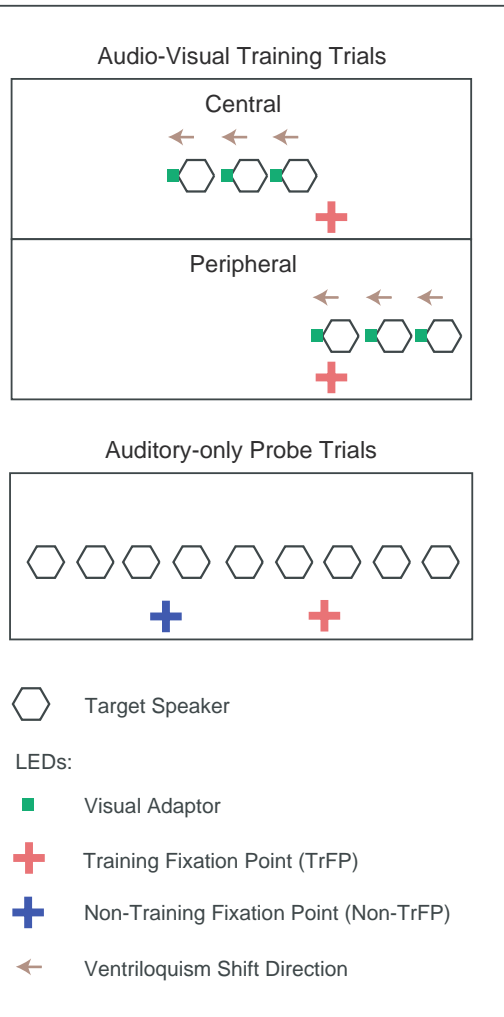

B) Predicted and Observed Ventriloquism Aftereffect

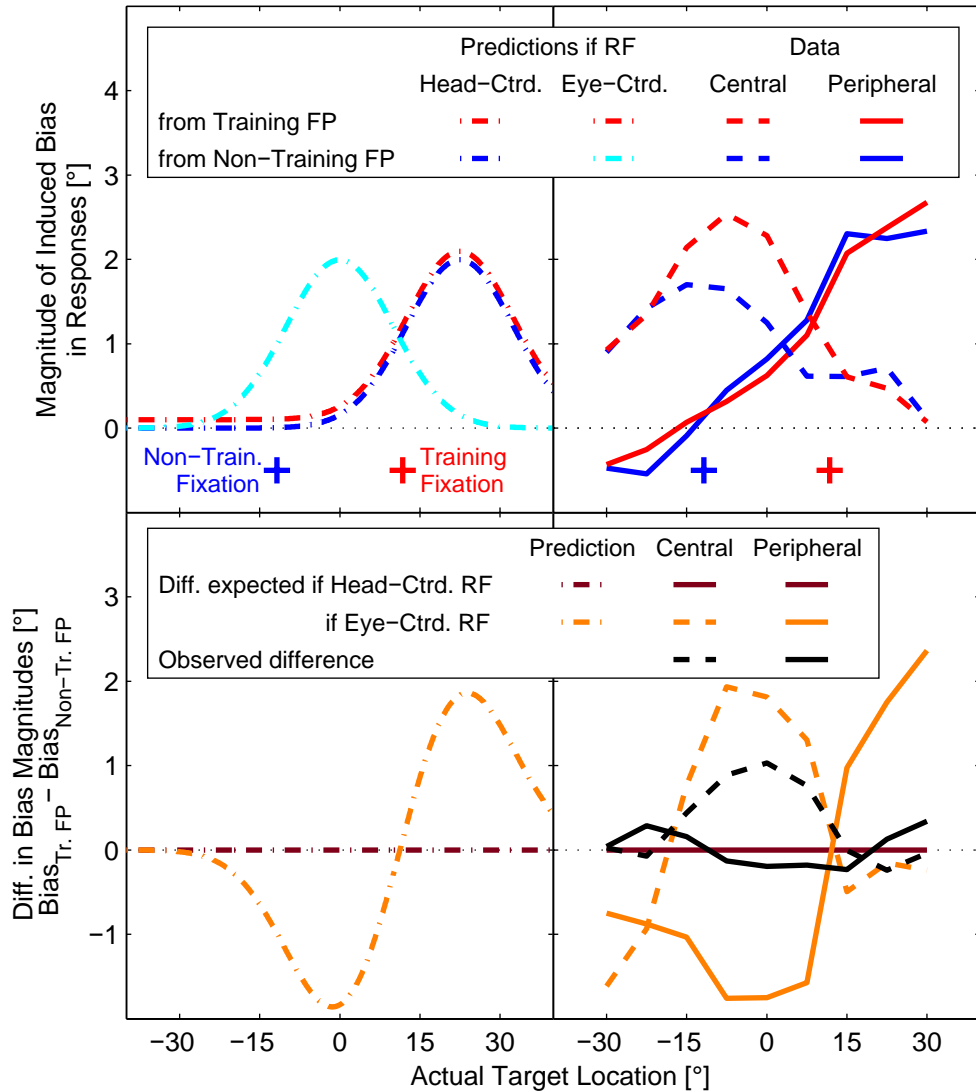

C) AV-aligned Baseline

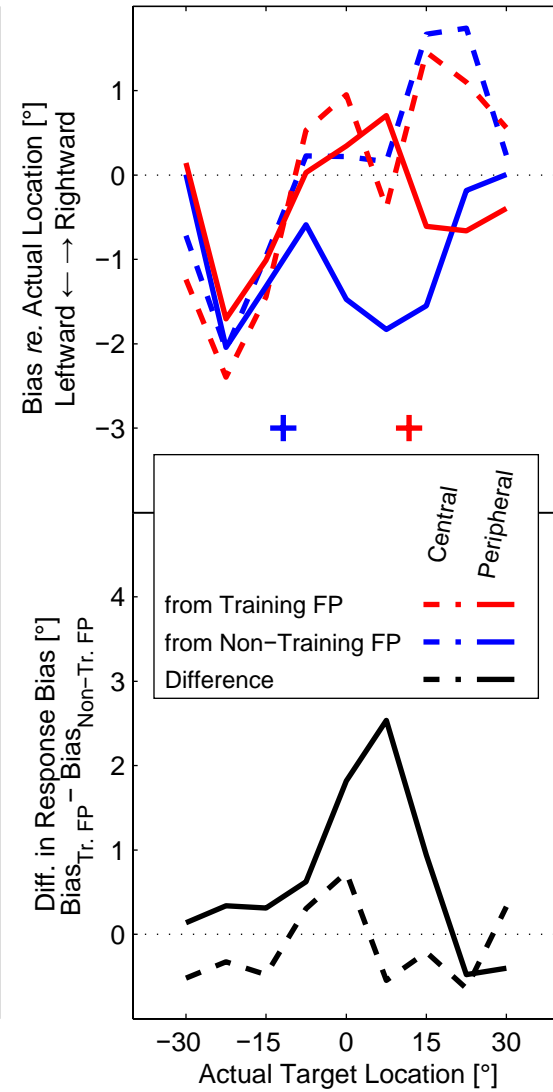

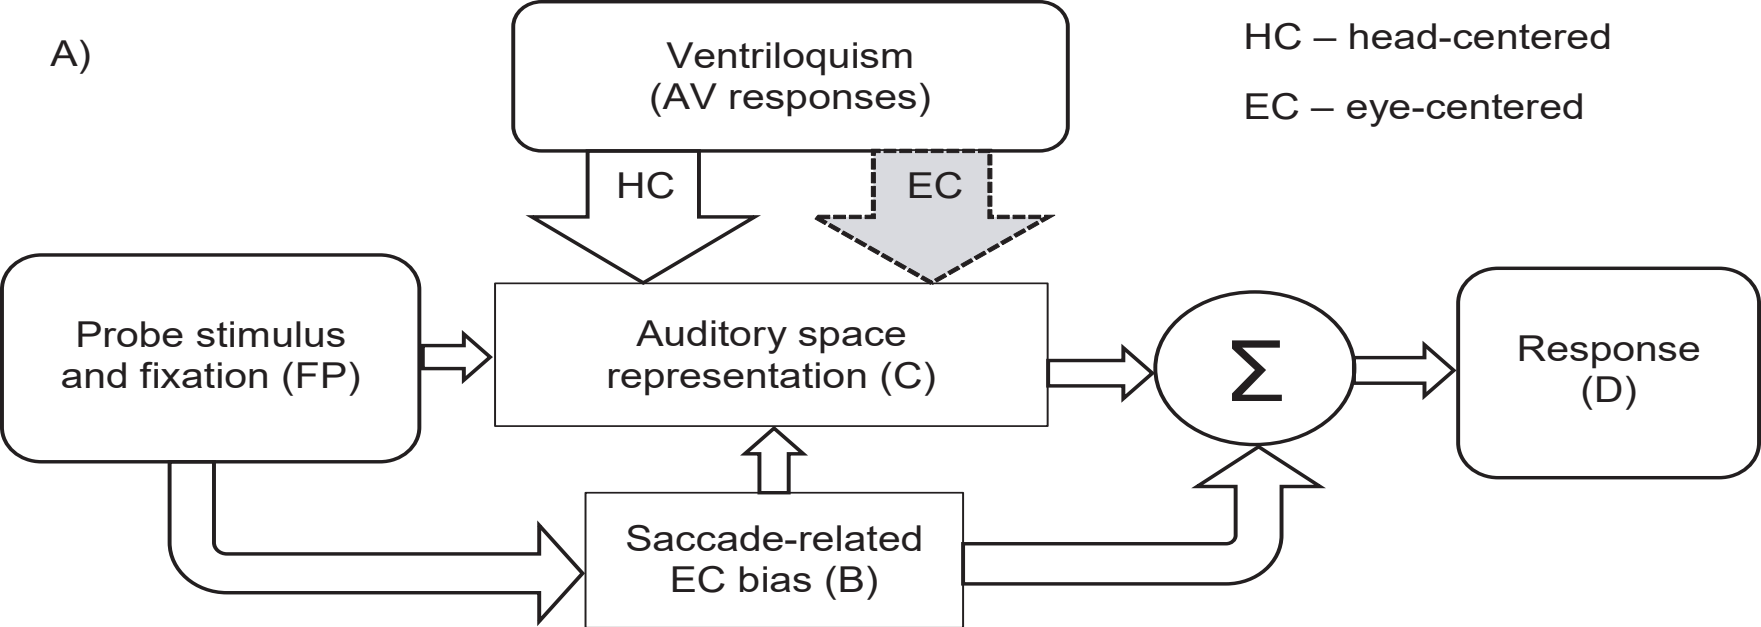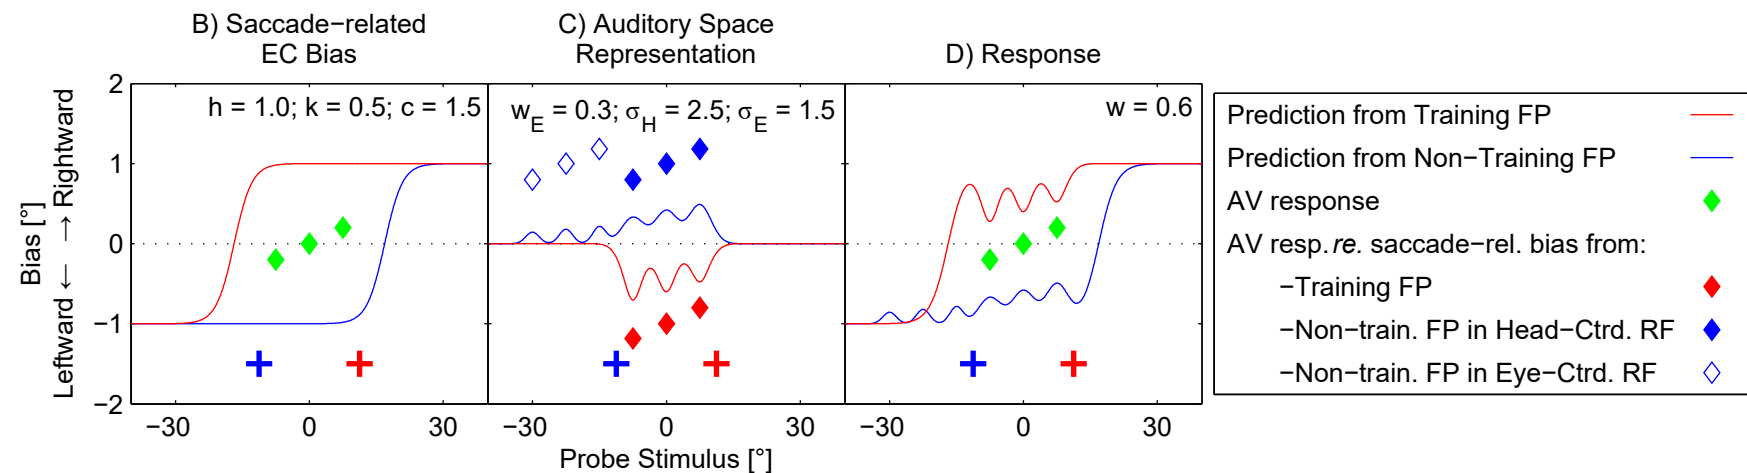

A) Model Components  
 Training FP      Non-training FP

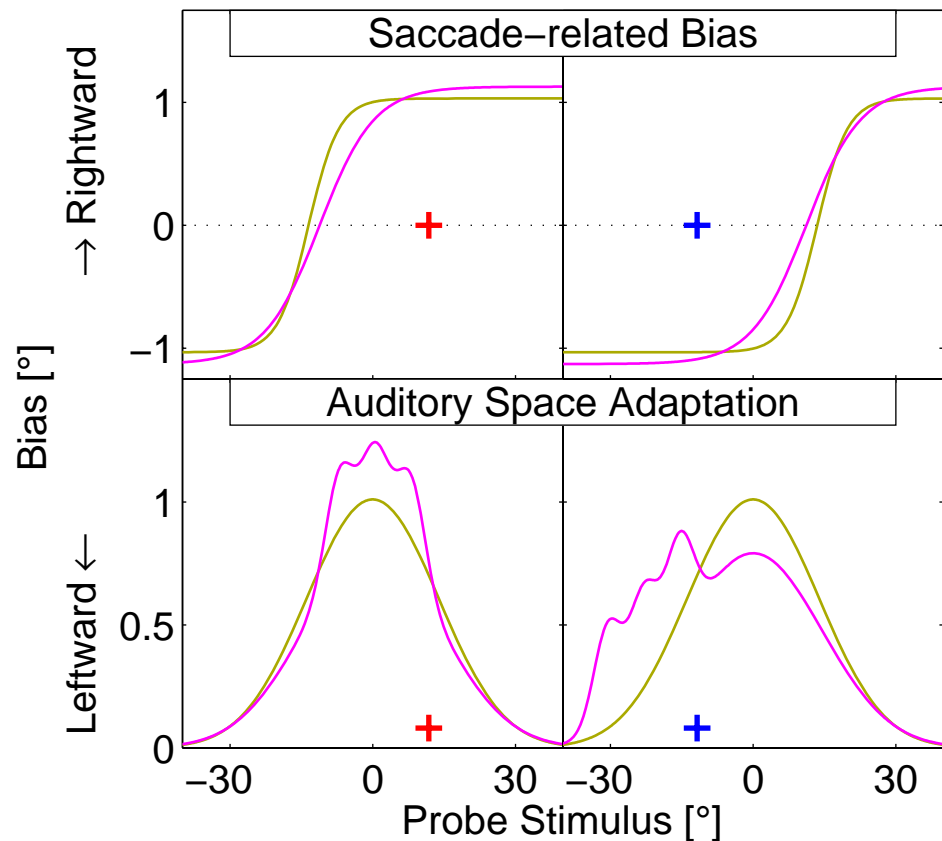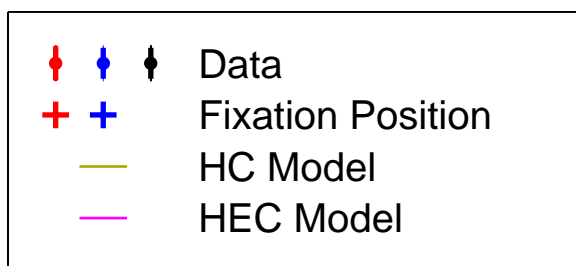

B) Data and Predictions  
 Central      Peripheral

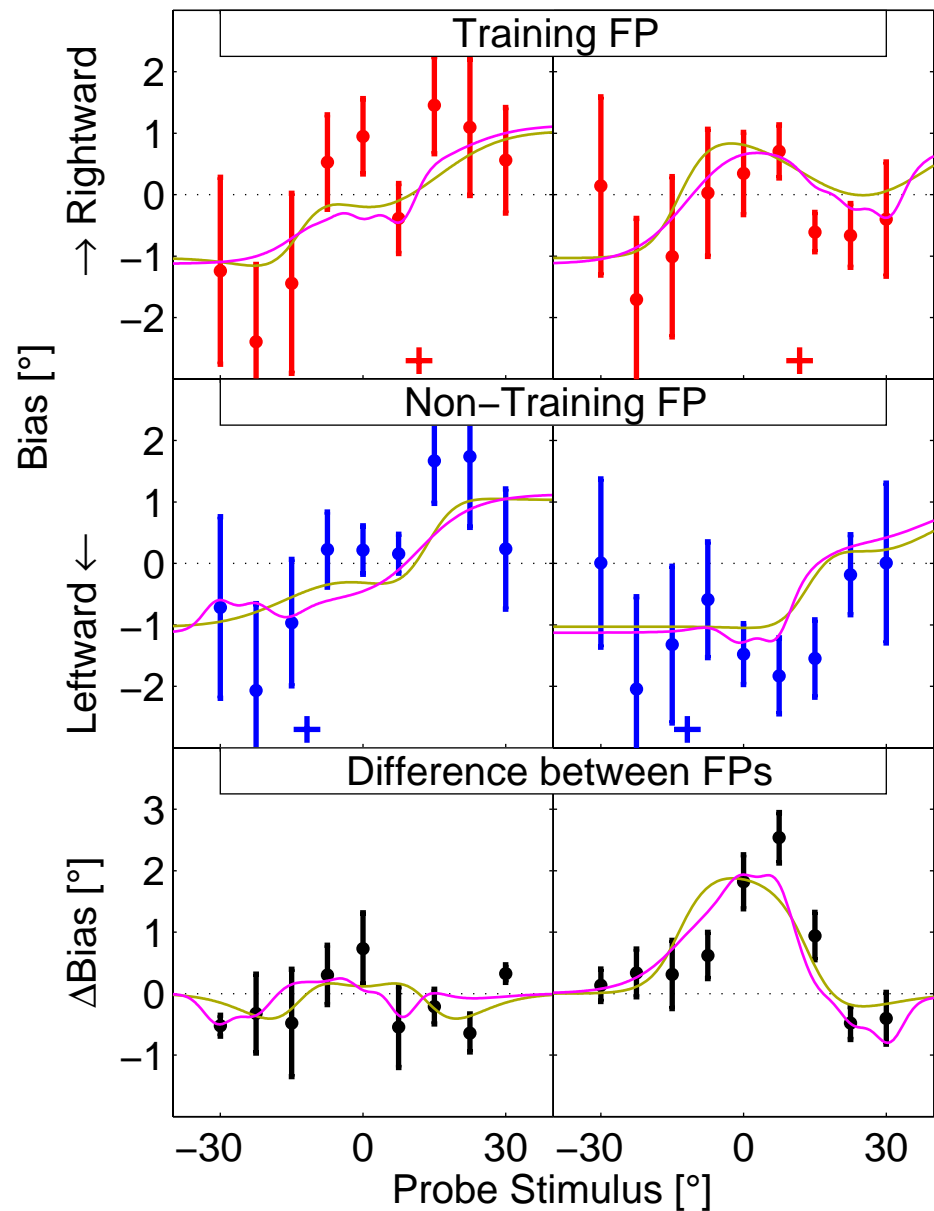

A) Model Components  
 Training FP      Non-training FP

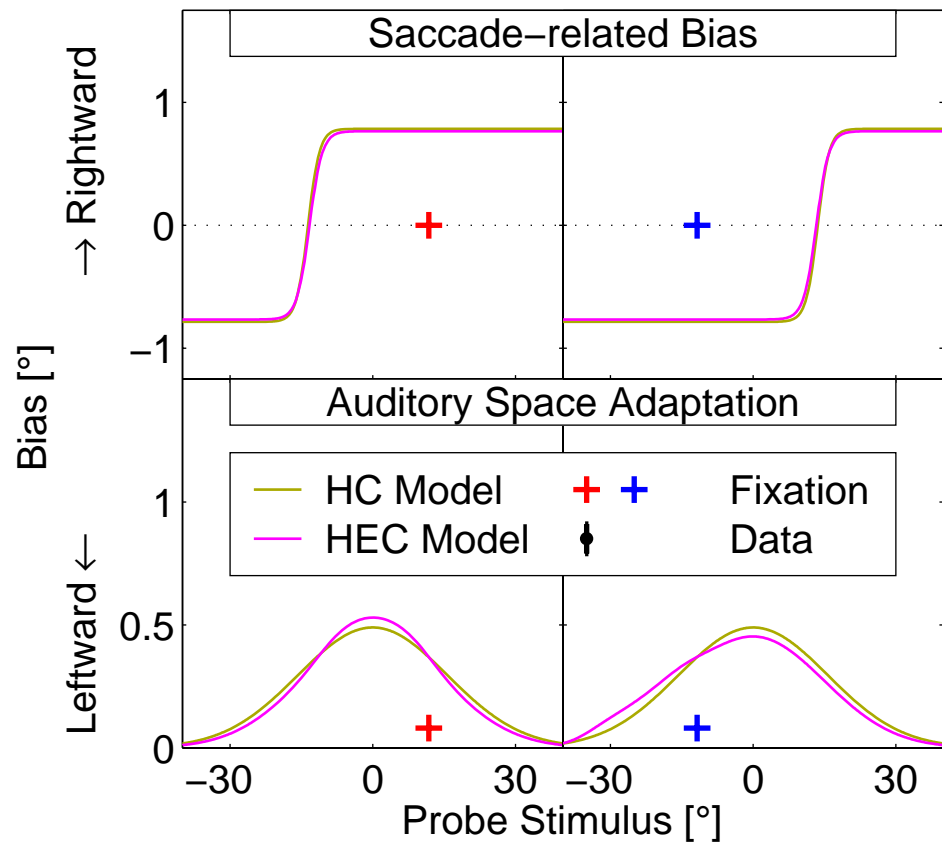

B) Data and Predictions  
 Central      Peripheral

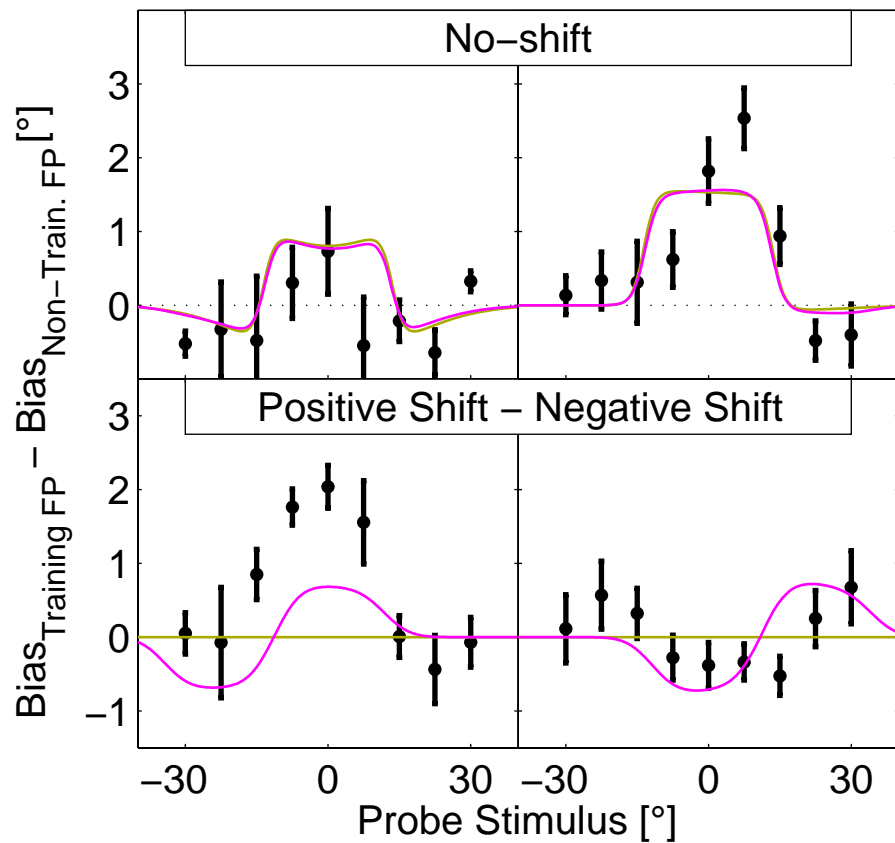



A) Model Components  
 Training FP      Non-training FP

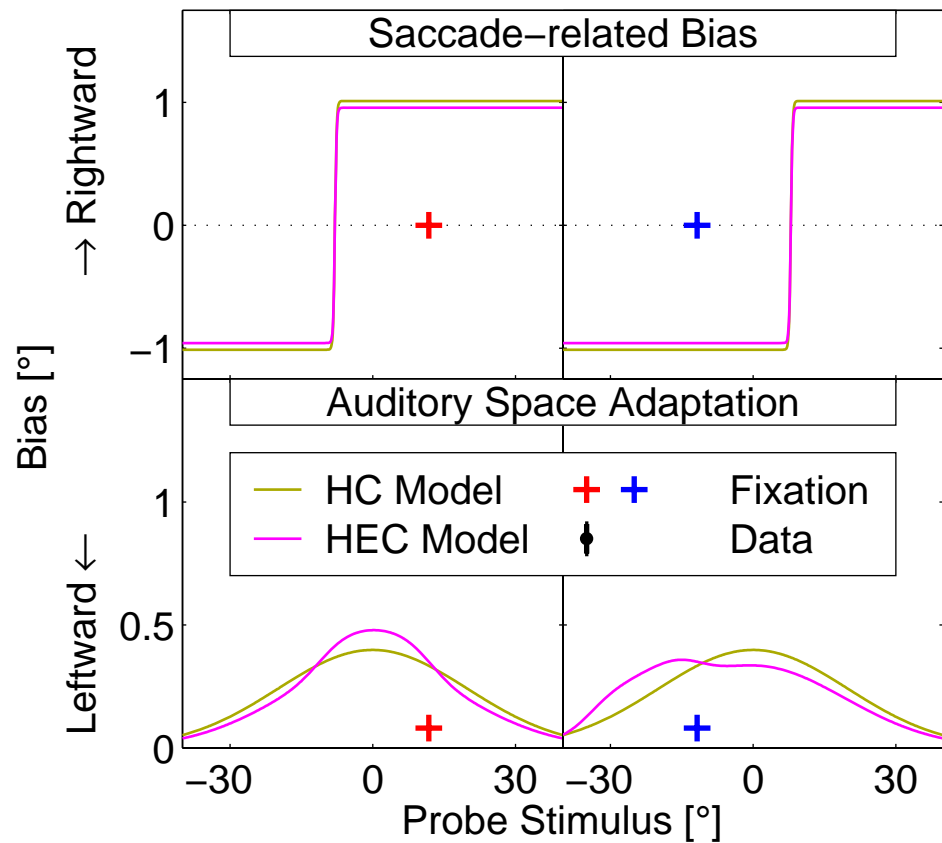

B) Data and Predictions  
 Central      Peripheral

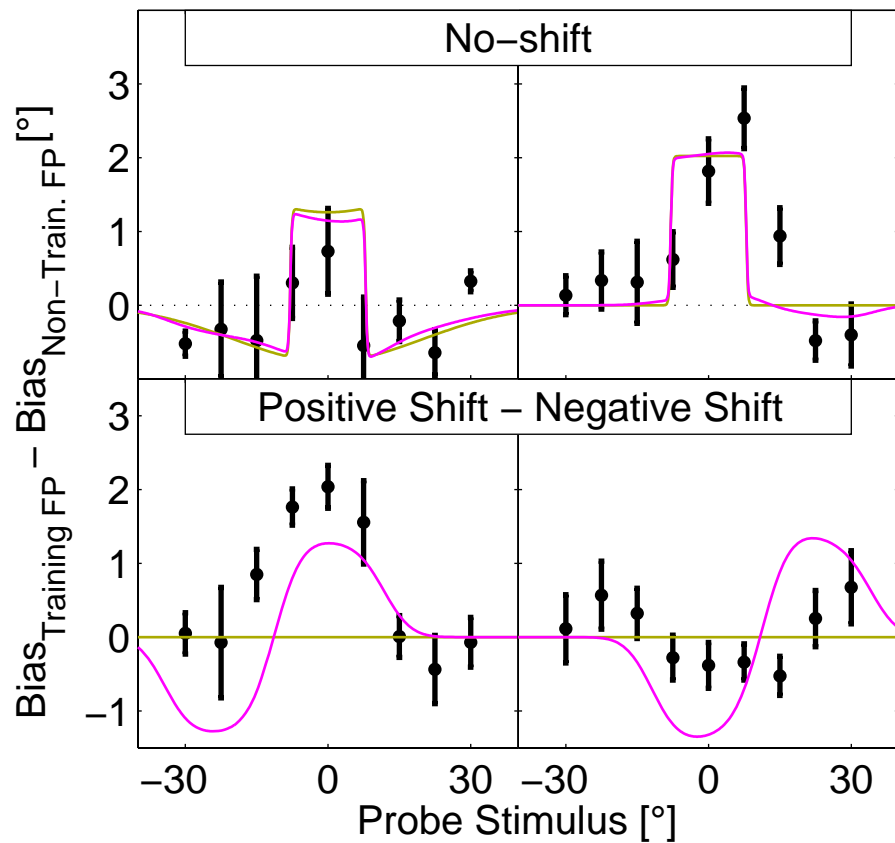

A) Model Components  
 Training FP      Non-training FP

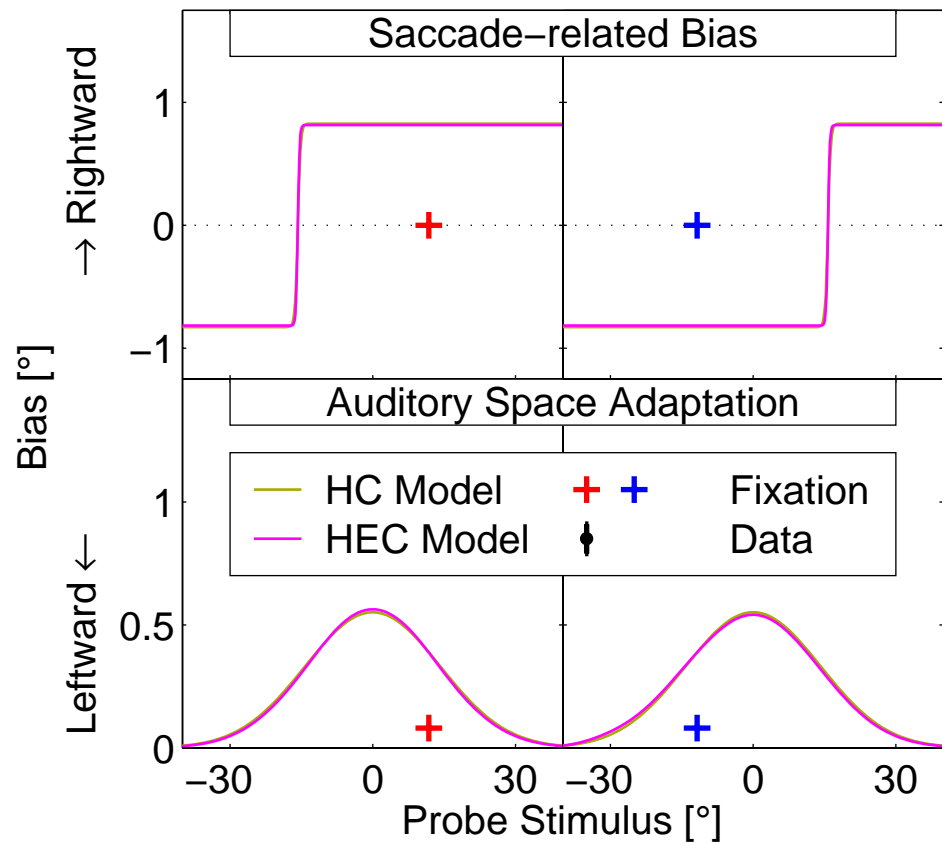

B) Data and Predictions  
 Central      Peripheral

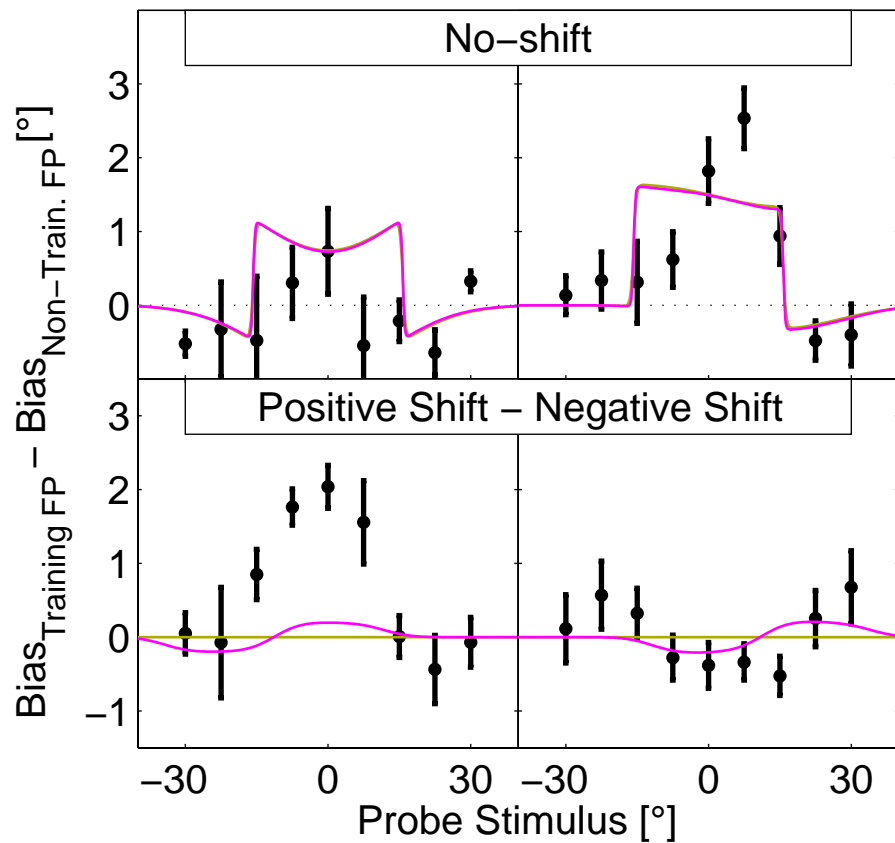

A) Responses re. Fixation

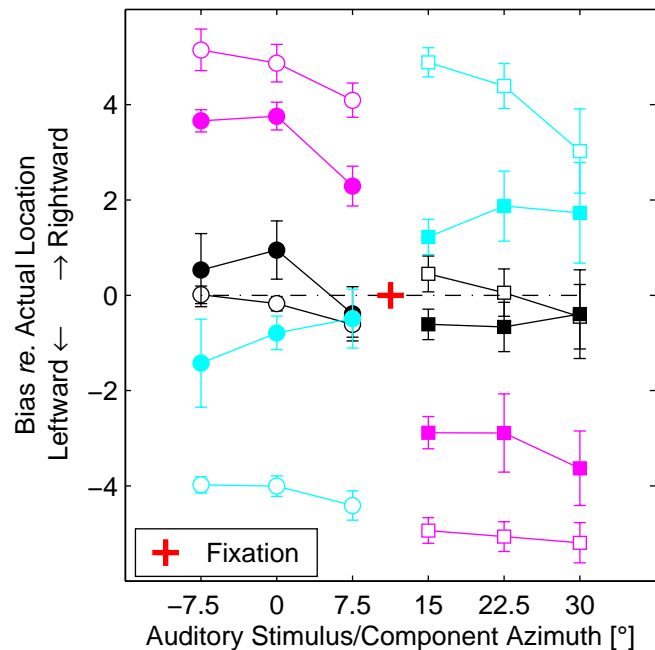

B) Saccade Amplitudes

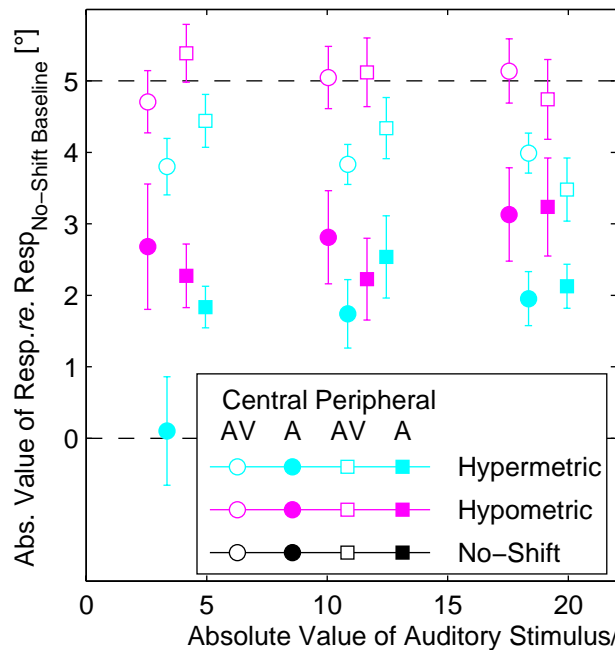

C) Aftereffect re. Effect

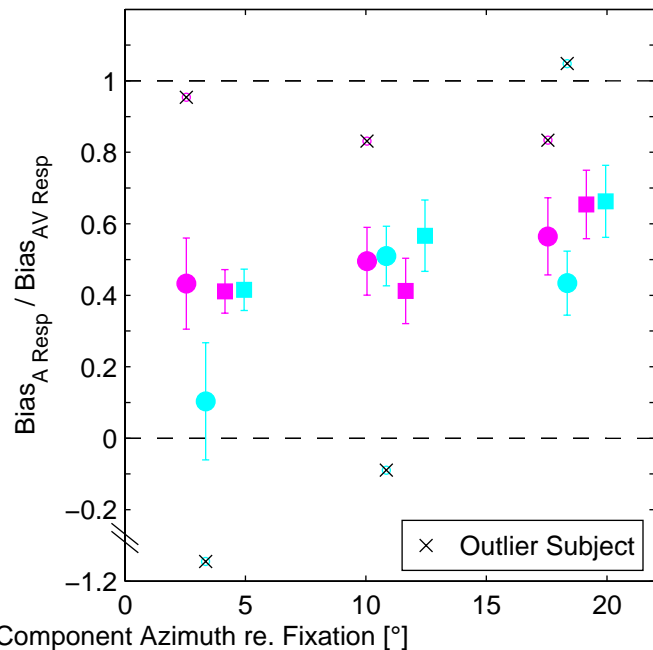

Source: https://www.biorxiv.org/content/10.1101/2021.03.31.437664v1.full.pdf
